# Supplementary material for: Evaluation of the Impact of Antimicrobial Use Protocols in Porcine Reproductive and Respiratory Syndrome Virus-Infected Swine on Phenotypic Antimicrobial Resistance Patterns
Source: PubMed Central journal article supplement (PMC8752131; doi:10.1128/aem.00970-21), 2022-01-11
Supplement: aem.00970-21-s0001.pdf [file aem.00970-21-s0001.pdf]

|                 | Antimicrobial agent | % AMR |         |       |       |        |       |        |       |       |      |     |    |     |     |    |     |    |    |      |     | Total | Range of Dilution tested |     |     |     |     |     |      |  |  |  |  |     |               |            |           |                 |                 |            |
|-----------------|---------------------|-------|---------|-------|-------|--------|-------|--------|-------|-------|------|-----|----|-----|-----|----|-----|----|----|------|-----|-------|--------------------------|-----|-----|-----|-----|-----|------|--|--|--|--|-----|---------------|------------|-----------|-----------------|-----------------|------------|
|                 |                     |       | <=0.015 | =0.03 | =0.06 | <=0.12 | =0.12 | <=0.25 | =0.25 | <=0.5 | =0.5 | <=1 | =1 | =2  | <=4 | =4 | > 4 | =8 | >8 | <=16 | =16 |       |                          | >16 | =32 | >32 | =64 | >64 | >256 |  |  |  |  |     |               |            |           |                 |                 |            |
| Minimal Group   | Amox / Clav         | 3.8   |         |       |       |        |       |        |       |       |      |     |    |     |     | 29 | 44  | 28 |    |      |     |       |                          | 3   | 1   |     |     |     |      |  |  |  |  | 105 | 1/0.5 - 32/16 |            |           |                 |                 |            |
|                 | Amp                 | 28.6  |         |       |       |        |       |        |       |       |      | 14  |    |     |     | 38 | 23  |    |    |      |     |       |                          |     |     |     |     |     |      |  |  |  |  |     | 105           | 1-32       |           |                 |                 |            |
|                 | Azith               | 0.0   |         |       |       |        |       |        |       |       |      |     |    |     | 1   | 23 | 76  | 5  |    |      |     |       |                          |     |     | R†  | R†  |     |      |  |  |  |  |     | 105           | 0.12 - 16* |           |                 |                 |            |
|                 | Cefox               | 3.8   |         |       |       |        |       |        |       |       |      |     |    |     |     | 28 | 69  | 4  |    |      |     |       |                          |     |     |     |     | 4   |      |  |  |  |  |     | 105           | 0.5 - 32   |           |                 |                 |            |
|                 | Ceftio              | 3.8   |         |       |       |        |       |        |       |       |      |     |    |     |     |    |     |    |    |      |     |       |                          |     |     |     |     |     |      |  |  |  |  |     |               | 105        | 0.12 - 8  |                 |                 |            |
|                 | Ceftria             | 3.8   |         |       |       |        |       |        |       |       |      |     |    | 100 |     |    |     |    |    |      |     |       |                          |     |     |     |     |     |      |  |  |  |  |     |               | 105        | 0.25 - 64 |                 |                 |            |
|                 | Chlor               | 8.6   |         |       |       |        |       |        |       |       |      |     |    |     |     |    |     | 25 | 69 |      |     |       |                          |     |     |     |     |     |      |  |  |  |  |     |               | 105        | 2-32      |                 |                 |            |
|                 | Cipro               | 0.0   | 98      | 4     |       |        |       |        |       |       |      |     |    |     |     |    |     |    |    |      |     |       |                          |     |     |     |     |     |      |  |  |  |  |     |               |            | 105       | 0.015 - 4       |                 |            |
|                 | Genta               | 1.0   |         |       |       |        |       |        |       |       |      |     |    |     |     |    |     |    |    |      |     |       |                          |     |     |     |     |     |      |  |  |  |  |     |               |            |           | 105             | 0.25 - 16       |            |
|                 | Nalid               | 1.0   |         |       |       |        |       |        |       |       |      |     |    |     |     |    |     |    |    |      |     |       |                          |     |     |     |     |     |      |  |  |  |  |     |               |            |           | 105             | 0.5 - 32        |            |
|                 | Strep               | 23.8  |         |       |       |        |       |        |       |       |      |     |    |     |     |    |     |    |    |      |     |       |                          |     |     |     |     |     |      |  |  |  |  |     |               |            |           | 105             | 2-64.           |            |
|                 | Sulfisox            | 0.0   |         |       |       |        |       |        |       |       |      |     |    |     |     |    |     |    |    |      |     |       |                          |     |     |     |     |     |      |  |  |  |  |     |               |            |           | 105             | 16 - 256**      |            |
|                 | Tetra               | 83.8  |         |       |       |        |       |        |       |       |      |     |    |     |     |    |     |    |    |      |     |       |                          |     |     |     |     |     |      |  |  |  |  |     |               |            |           | 105             | 4-32            |            |
| Trim / Sulfa    | 0.0                 |       |         |       |       |        |       |        |       |       |      |     |    |     |     |    |     |    |    |      |     |       |                          |     |     |     |     |     |      |  |  |  |  |     |               |            | 105       | 0.12/2.4 - 4/76 |                 |            |
| Moderate Group  | Amox / Clav         | 1.0   |         |       |       |        |       |        |       |       |      |     |    |     |     |    |     |    |    |      |     |       |                          |     |     |     |     |     |      |  |  |  |  |     |               |            | 101       | 1/0.5 - 32/16   |                 |            |
|                 | Amp                 | 47.5  |         |       |       |        |       |        |       |       |      |     |    |     |     |    |     |    |    |      |     |       |                          |     |     |     |     |     |      |  |  |  |  |     |               |            |           | 101             | 1-32            |            |
|                 | Azith               | 0.0   |         |       |       |        |       |        |       |       |      |     |    |     |     |    |     |    |    |      |     |       |                          |     |     |     |     |     |      |  |  |  |  |     |               |            |           | 101             | 0.12 - 16*      |            |
|                 | Cefox               | 0.0   |         |       |       |        |       |        |       |       |      |     |    |     |     |    |     |    |    |      |     |       |                          |     |     |     |     |     |      |  |  |  |  |     |               |            |           | 101             | 0.5 - 32        |            |
|                 | Ceftio              | 0.0   |         |       |       |        |       |        |       |       |      |     |    |     |     |    |     |    |    |      |     |       |                          |     |     |     |     |     |      |  |  |  |  |     |               |            |           | 101             | 0.12 - 8        |            |
|                 | Ceftria             | 0.0   |         |       |       |        |       |        |       |       |      |     |    |     |     |    |     |    |    |      |     |       |                          |     |     |     |     |     |      |  |  |  |  |     |               |            |           | 101             | 0.25 - 64       |            |
|                 | Chlor               | 3.0   |         |       |       |        |       |        |       |       |      |     |    |     |     |    |     |    |    |      |     |       |                          |     |     |     |     |     |      |  |  |  |  |     |               |            |           | 101             | 2-32            |            |
|                 | Cipro               | 0.0   | 97      | 3     |       |        |       |        |       |       |      |     |    |     |     |    |     |    |    |      |     |       |                          |     |     |     |     |     |      |  |  |  |  |     |               |            |           | 101             | 0.015 - 4       |            |
|                 | Genta               | 1.0   |         |       |       |        |       |        |       |       |      |     |    |     |     |    |     |    |    |      |     |       |                          |     |     |     |     |     |      |  |  |  |  |     |               |            |           |                 | 101             | 0.25 - 16  |
|                 | Nalid               | 0.0   |         |       |       |        |       |        |       |       |      |     |    |     |     |    |     |    |    |      |     |       |                          |     |     |     |     |     |      |  |  |  |  |     |               |            |           |                 | 101             | 0.5 - 32   |
|                 | Strep               | 60.4  |         |       |       |        |       |        |       |       |      |     |    |     |     |    |     |    |    |      |     |       |                          |     |     |     |     |     |      |  |  |  |  |     |               |            |           |                 | 101             | 2-64.      |
|                 | Sulfisox            | 0.0   |         |       |       |        |       |        |       |       |      |     |    |     |     |    |     |    |    |      |     |       |                          |     |     |     |     |     |      |  |  |  |  |     |               |            |           |                 | 101             | 16 - 256** |
|                 | Tetra               | 91.1  |         |       |       |        |       |        |       |       |      |     |    |     |     |    |     |    |    |      |     |       |                          |     |     |     |     |     |      |  |  |  |  |     |               |            |           |                 | 101             | 4-32       |
| Trim / Sulfa    | 0.0                 |       |         |       |       |        |       |        |       |       |      |     |    |     |     |    |     |    |    |      |     |       |                          |     |     |     |     |     |      |  |  |  |  |     |               |            |           | 101             | 0.12/2.4 - 4/76 |            |
| Intensive Group | Amox / Clav         | 3.0   |         |       |       |        |       |        |       |       |      |     |    |     |     |    |     |    |    |      |     |       |                          |     |     |     |     |     |      |  |  |  |  |     |               |            |           | 101             | 1/0.5 - 32/16   |            |
|                 | Amp                 | 35.6  |         |       |       |        |       |        |       |       |      |     |    |     |     |    |     |    |    |      |     |       |                          |     |     |     |     |     |      |  |  |  |  |     |               |            |           | 101             | 1-32            |            |
|                 | Azith               | 0.0   |         |       |       |        |       |        |       |       |      |     |    |     |     |    |     |    |    |      |     |       |                          |     |     |     |     |     |      |  |  |  |  |     |               |            |           |                 | 102             | 0.12 - 16* |
|                 | Cefox               | 1.0   |         |       |       |        |       |        |       |       |      |     |    |     |     |    |     |    |    |      |     |       |                          |     |     |     |     |     |      |  |  |  |  |     |               |            |           |                 | 101             | 0.5 - 32   |
|                 | Ceftio              | 1.0   |         |       |       |        |       |        |       |       |      |     |    |     |     |    |     |    |    |      |     |       |                          |     |     |     |     |     |      |  |  |  |  |     |               |            |           |                 | 101             | 0.12 - 8   |
|                 | Ceftria             | 1.0   |         |       |       |        |       |        |       |       |      |     |    |     |     |    |     |    |    |      |     |       |                          |     |     |     |     |     |      |  |  |  |  |     |               |            |           |                 | 101             | 0.25 - 64  |
|                 | Chlor               | 8.9   |         |       |       |        |       |        |       |       |      |     |    |     |     |    |     |    |    |      |     |       |                          |     |     |     |     |     |      |  |  |  |  |     |               |            |           | 101             | 2-32            |            |
|                 | Cipro               | 1.0   | 89      | 2     |       |        |       |        |       |       |      |     |    |     |     |    |     |    |    |      |     |       |                          |     |     |     |     |     |      |  |  |  |  |     |               |            |           |                 | 101             | 0.015 - 4  |
|                 | Genta               | 2.0   |         |       |       |        |       |        |       |       |      |     |    |     |     |    |     |    |    |      |     |       |                          |     |     |     |     |     |      |  |  |  |  |     |               |            |           |                 | 101             | 0.25 - 16  |
|                 | Nalid               | 4.0   |         |       |       |        |       |        |       |       |      |     |    |     |     |    |     |    |    |      |     |       |                          |     |     |     |     |     |      |  |  |  |  |     |               |            |           |                 | 101             | 0.5 - 32   |
|                 | Strep               | 21.8  |         |       |       |        |       |        |       |       |      |     |    |     |     |    |     |    |    |      |     |       |                          |     |     |     |     |     |      |  |  |  |  |     |               |            |           |                 | 101             | 2-64.      |
|                 | Sulfisox            | 0.0   |         |       |       |        |       |        |       |       |      |     |    |     |     |    |     |    |    |      |     |       |                          |     |     |     |     |     |      |  |  |  |  |     |               |            |           |                 | 101             | 16 - 256** |
|                 | Tetra               | 93.1  |         |       |       |        |       |        |       |       |      |     |    |     |     |    |     |    |    |      |     |       |                          |     |     |     |     |     |      |  |  |  |  |     |               |            |           |                 | 101             | 4-32       |
| Trim / Sulfa    | 6.9                 |       |         |       |       |        |       |        |       |       |      |     |    |     |     |    |     |    |    |      |     |       |                          |     |     |     |     |     |      |  |  |  |  |     |               |            |           | 101             | 0.12/2.4 - 4/76 |            |

1

2

3 Table S1. Distribution (number of isolates) of minimum inhibitory concentrations (MICs) for *Escherichia coli* in swine across all sampling4 events. R†: CLSI breakpoints are not established for azithromycin and *E. coli*; interpretive standards used are NARMS-established breakpoints

5 for resistance monitoring and should not be used to predict clinical efficacy. \*: Final dilution tested was >16 corresponding with  $\geq 32$ . \*\*:

6 Final dilution tested was >256 corresponding with  $\geq 512$ .

7

|                 | Antimicrobial agent | % AMR | MIC Breakpoints |       |       |        |       |       |      |     |    |    |    |    |    |    |     |     |     |     |     | Total | Range of dilution tested |       |     |       |     |      |           |             |             |
|-----------------|---------------------|-------|-----------------|-------|-------|--------|-------|-------|------|-----|----|----|----|----|----|----|-----|-----|-----|-----|-----|-------|--------------------------|-------|-----|-------|-----|------|-----------|-------------|-------------|
|                 |                     |       | =0.03           | =0.06 | =0.12 | <=0.25 | =0.25 | <=0.5 | =0.5 | <=1 | =1 | =2 | =4 | >4 | =8 | >8 | =16 | =32 | >32 | =64 | >64 |       |                          | <=128 | 256 | <=512 | 512 | 1024 | >1024     | =2048       | >2048       |
| Minimal Group   | Chlor               | 0.0   |                 |       |       |        |       |       |      |     | 6  |    | 87 |    | 7  |    |     |     |     |     |     |       |                          |       |     |       |     |      |           | 100         | 2-32        |
|                 | Cipro               | 17.0  |                 |       |       |        | 1     |       | 31   |     | 23 | 28 | 12 | 5  |    |    |     |     |     |     |     |       |                          |       |     |       |     |      |           | 100         | 0.12 - 4    |
|                 | Dapto               | 5.0   |                 |       |       |        |       |       |      |     | 14 | 41 | 40 |    | 5  |    |     |     |     |     |     |       |                          |       |     |       |     |      |           | 100         | 0.25 - 16   |
|                 | Eryth               | 44.0  |                 |       |       | 19     |       |       |      |     | 12 | 18 | 7  |    | 2  | 42 |     |     |     |     |     |       |                          |       |     |       |     |      |           | 100         | 0.25 - 8    |
|                 | Genta               | 1.0   |                 |       |       |        |       |       |      |     |    |    |    |    |    |    |     |     |     |     |     |       |                          | 98    | 2   |       |     |      |           | 100         | 128 - 1024  |
|                 | Kanam               | 8.0   |                 |       |       |        |       |       |      |     |    |    |    |    |    |    |     |     |     |     |     |       | 83                       | 7     |     | 2     |     | 8    |           | 100         | 128 - 1024  |
|                 | Linco               | 96.0  |                 |       |       |        |       |       | 4    |     |    |    |    |    | 1  | 95 |     |     |     |     |     |       |                          |       |     |       |     |      |           | 100         | 1-8         |
|                 | Linez               | 0.0   |                 |       |       |        |       |       |      |     |    |    | 92 | 8  |    |    |     |     |     |     |     |       |                          |       |     |       |     |      |           | 100         | 0.5 - 8     |
|                 | Nitro               | 4.0   |                 |       |       |        |       |       |      |     |    |    |    |    | 2  |    | 17  | 22  |     |     |     | 55    | 4                        |       |     |       |     |      |           | 100         | 2-64        |
|                 | Pen                 | 1.0   |                 |       |       |        |       |       |      |     | 10 | 22 | 59 |    | 8  |    | 1   |     |     |     |     |       |                          |       |     |       |     |      |           | 100         | 0.25 - 16   |
|                 | Quin/Dalf           | 55.0  |                 |       |       |        |       | 4     |      |     | 1  | 40 | 21 |    | 11 |    | 13  | 7   | 3   |     |     |       |                          |       |     |       |     |      |           | 100         | 0.5 - 32    |
|                 | Strep               | 9.0   |                 |       |       |        |       |       |      |     |    |    |    |    |    |    |     |     |     |     |     |       | 91                       |       |     | 4     |     | 4    | 1         | 100         | 512 - 2048  |
|                 | Tetra               | 72.0  |                 |       |       |        |       |       |      |     | 28 |    |    |    |    |    |     |     |     |     |     |       |                          |       |     |       |     |      |           | 100         | 1-32        |
|                 | Tige                | 1.0   | 5               | 27    | 53    |        | 14    |       | 1    |     |    |    |    |    |    |    |     |     |     |     |     |       |                          |       |     |       |     |      |           | 100         | 0.015 - 0.5 |
| Tylosin         | 41.0                |       |                 |       |       |        |       |       | 1    | 16  | 15 |    |    | 23 |    | 4  |     |     |     |     |     |       |                          |       |     |       |     |      | 100       | 0.25 - 32   |             |
| Vanco           | 0.0                 |       |                 |       |       |        |       |       | 57   | 33  | 10 |    |    |    |    |    |     |     |     |     |     |       |                          |       |     |       |     |      | 100       | 0.25 - 32   |             |
| Moderate Group  | Chlor               | 1.1   |                 |       |       |        |       |       |      |     |    |    | 9  |    | 73 |    | 9   | 1   |     |     |     |       |                          |       |     |       |     |      | 92        | 2-32        |             |
|                 | Cipro               | 6.5   |                 |       |       |        | 2     |       | 37   |     | 23 | 24 | 5  | 1  |    |    |     |     |     |     |     |       |                          |       |     |       |     |      | 92        | 0.12 - 4    |             |
|                 | Dapto               | 4.3   |                 |       |       |        |       |       |      |     | 20 | 40 | 28 |    | 4  |    |     |     |     |     |     |       |                          |       |     |       |     |      | 92        | 0.25 - 16   |             |
|                 | Eryth               | 47.8  |                 |       |       | 31     |       |       |      |     | 3  | 6  | 8  |    | 2  | 42 |     |     |     |     |     |       |                          |       |     |       |     |      | 92        | 0.25 - 8    |             |
|                 | Genta               | 3.3   |                 |       |       |        |       |       |      |     |    |    |    |    |    |    |     |     |     |     |     | 87    | 4                        |       |     |       | 1   |      | 92        | 128 - 1024  |             |
|                 | Kanam               | 17.4  |                 |       |       |        |       |       |      |     |    |    |    |    |    |    |     |     |     |     |     | 67    | 7                        |       | 2   |       | 16  |      | 92        | 128 - 1024  |             |
|                 | Linco               | 93.5  |                 |       |       |        |       |       |      | 3   |    | 3  |    |    |    |    |     |     |     |     |     |       |                          |       |     |       |     |      | 92        | 1-8         |             |
|                 | Linez               | 0.0   |                 |       |       |        |       |       |      |     |    | 5  | 81 | 6  |    |    |     |     |     |     |     |       |                          |       |     |       |     |      | 92        | 0.5 - 8     |             |
|                 | Nitro               | 11.9  |                 |       |       |        |       |       |      |     |    |    |    |    |    |    | 2   |     | 18  | 31  |     | 30    | 11                       |       |     |       |     |      | 92        | 2-64        |             |
|                 | Pen                 | 1.1   |                 |       |       |        | 1     |       |      |     | 14 | 30 | 44 |    | 2  |    | 1   |     |     |     |     |       |                          |       |     |       |     |      | 92        | 0.25 - 16   |             |
|                 | Quin/Dalf           | 50.0  |                 |       |       |        |       | 3     |      |     | 2  | 41 | 16 |    | 13 |    | 5   | 10  | 2   |     |     |       |                          |       |     |       |     |      | 92        | 0.5 - 32    |             |
|                 | Strep               | 17.4  |                 |       |       |        |       |       |      |     |    |    |    |    |    |    |     |     |     |     |     |       | 76                       |       |     | 6     |     | 6    | 4         | 92          | 512 - 2048  |
|                 | Tetra               | 72.8  |                 |       |       |        |       |       |      |     | 24 | 1  |    |    |    |    |     |     |     |     |     |       |                          |       |     |       |     |      | 92        | 1-32        |             |
|                 | Tige                | 0.0   | 4               | 25    | 53    |        | 10    |       |      |     |    |    |    |    |    |    |     |     |     |     |     |       |                          |       |     |       |     |      | 92        | 0.015 - 0.5 |             |
| Tylosin         | 44.6                |       |                 |       |       |        |       |       |      | 1   | 3  | 31 |    | 14 |    | 2  |     |     |     |     |     |       |                          |       |     |       |     | 92   | 0.25 - 32 |             |             |
| Vanco           | 0.0                 |       |                 |       |       |        |       |       | 58   | 33  | 1  |    |    |    |    |    |     |     |     |     |     |       |                          |       |     |       |     | 92   | 0.25 - 32 |             |             |
| Intensive Group | Chlor               | 0.0   |                 |       |       |        |       |       |      |     |    |    | 26 |    | 73 |    | 1   |     |     |     |     |       |                          |       |     |       |     |      | 100       | 2-32        |             |
|                 | Cipro               | 6.0   |                 |       |       |        |       |       | 53   |     | 29 | 12 | 3  | 3  |    |    |     |     |     |     |     |       |                          |       |     |       |     |      | 100       | 0.12 - 4    |             |
|                 | Dapto               | 1.0   |                 |       |       |        |       |       |      |     | 29 | 51 | 19 |    | 1  |    |     |     |     |     |     |       |                          |       |     |       |     |      | 100       | 0.25 - 16   |             |
|                 | Eryth               | 48.0  |                 |       |       | 33     |       |       |      |     | 5  | 7  | 6  |    |    |    |     |     |     |     |     |       |                          |       |     |       |     |      | 100       | 0.25 - 8    |             |
|                 | Genta               | 6.0   |                 |       |       |        |       |       |      |     |    |    |    |    |    |    |     |     |     |     |     |       | 93                       | 1     |     | 3     | 2   | 1    | 100       | 128 - 1024  |             |
|                 | Kanam               | 12.0  |                 |       |       |        |       |       |      |     |    |    |    |    |    |    |     |     |     |     |     |       | 87                       | 1     |     |       |     | 12   | 100       | 128 - 1024  |             |
|                 | Linco               | 94.0  |                 |       |       |        |       |       |      | 5   |    | 1  |    |    |    |    |     |     |     |     |     |       |                          |       |     |       |     |      | 100       | 1-8         |             |
|                 | Linez               | 0.0   |                 |       |       |        |       |       |      |     | 4  | 96 |    |    |    |    |     |     |     |     |     |       |                          |       |     |       |     |      | 100       | 0.5 - 8     |             |
|                 | Nitro               | 4.0   |                 |       |       |        |       |       |      |     |    |    |    |    |    |    |     |     |     |     |     |       |                          |       |     |       |     |      | 100       | 2-64        |             |
|                 | Pen                 | 5.0   |                 |       |       |        | 1     |       |      |     | 24 | 40 | 28 |    | 2  |    | 5   |     |     |     |     |       |                          |       |     |       |     |      | 100       | 0.25 - 16   |             |
|                 | Quin/Dalf           | 51.0  |                 |       |       |        |       |       |      |     | 5  |    | 2  | 42 | 15 |    | 21  |     | 10  | 5   |     |       |                          |       |     |       |     |      | 100       | 0.5 - 32    |             |
|                 | Strep               | 14.0  |                 |       |       |        |       |       |      |     |    |    |    |    |    |    |     |     |     |     |     |       |                          |       |     |       |     |      | 100       | 512 - 2048  |             |
|                 | Tetra               | 85.0  |                 |       |       |        |       |       |      |     | 15 |    |    |    |    |    |     |     |     |     |     |       | 86                       |       |     | 4     |     | 5    | 5         | 100         | 1-32        |
|                 | Tige                | 0.0   | 2               | 27    | 60    |        | 11    |       |      |     |    |    |    |    |    |    |     |     |     |     |     |       |                          |       |     |       |     |      | 100       | 0.015 - 0.5 |             |
| Tylosin         | 49.0                |       |                 |       |       |        |       |       |      | 3   | 12 | 30 |    | 6  |    |    |     |     |     |     |     |       |                          |       |     |       |     | 100  | 0.25 - 32 |             |             |
| Vanco           | 0.0                 |       |                 |       |       |        |       |       | 72   | 24  | 4  |    |    |    |    |    |     |     |     |     |     |       |                          |       |     |       |     | 100  | 0.25 - 32 |             |             |

8

9

10 Table S2. Distribution (number of isolates) of minimum inhibitory concentrations (MICs) for *Enterococcus sp.* in swine across all sampling  
 11 events.

| Bacteria       | Antimicrobial                 | Group | Week | N    | Proportion Resistant | Lower CI | Upper CI |
|----------------|-------------------------------|-------|------|------|----------------------|----------|----------|
| <i>E. coli</i> | Amoxicillin / Clavulonic Acid | Min   | 1    | 12   | 16.6%                | 2.0%     | 48.4%    |
|                |                               | Min   | 6    | 11   | 9.0%                 | 0.2%     | 41.2%    |
|                |                               | Min   | 7    | 12   | 0%                   | 0%       | 26.5%    |
|                |                               | Min   | 8    | 12   | 0%                   | 0%       | 26.5%    |
|                |                               | Min   | 9    | 11   | 9.0%                 | 0.2%     | 41.2%    |
|                |                               | Min   | 10   | 12   | 0%                   | 0%       | 26.5%    |
|                |                               | Min   | 11   | 11   | 0%                   | 0%       | 28.5%    |
|                |                               | Min   | 14   | 12   | 0%                   | 0%       | 26.5%    |
|                |                               | Min   | 25   | 12   | 0%                   | 0%       | 26.5%    |
|                |                               | Mod   | 1    | 12   | 0%                   | 0%       | 26.5%    |
|                |                               | Mod   | 6    | 9    | 0%                   | 0%       | 33.6%    |
|                |                               | Mod   | 7    | 12   | 0%                   | 0%       | 26.5%    |
|                |                               | Mod   | 8    | 11   | 0%                   | 0%       | 28.5%    |
|                |                               | Mod   | 9    | 11   | 0%                   | 0%       | 28.5%    |
|                |                               | Mod   | 10   | 12   | 0%                   | 0%       | 26.5%    |
|                |                               | Mod   | 11   | 10   | 0%                   | 0%       | 30.8%    |
|                |                               | Mod   | 14   | 12   | 0%                   | 0%       | 26.5%    |
|                |                               | Mod   | 25   | 12   | 8.3%                 | 0.2%     | 38.4%    |
|                |                               | Int   | 1    | 9    | 11.1%                | 0.2%     | 48.2%    |
|                |                               | Int   | 6    | 11   | 9.0%                 | 0.2%     | 41.2%    |
|                |                               | Int   | 7    | 11   | 0%                   | 0%       | 28.5%    |
|                |                               | Int   | 8    | 11   | 0%                   | 0%       | 28.5%    |
|                |                               | Int   | 9    | 12   | 0%                   | 0%       | 26.5%    |
|                |                               | Int   | 10   | 12   | 0%                   | 0%       | 26.5%    |
|                |                               | Int   | 11   | 11   | 0%                   | 0%       | 28.5%    |
| Int            | 14                            | 12    | 0%   | 0%   | 26.5%                |          |          |
| Int            | 25                            | 12    | 8.3% | 0.2% | 38.4%                |          |          |
| <i>E. coli</i> | Ampicillin                    | Min   | 1    | 12   | 33.3%                | 9.9%     | 65.1%    |
|                |                               | Min   | 6    | 11   | 36.3%                | 10.9%    | 69.2%    |
|                |                               | Min   | 7    | 12   | 41.6%                | 15.1%    | 72.3%    |
|                |                               | Min   | 8    | 12   | 41.6%                | 15.1%    | 72.3%    |
|                |                               | Min   | 9    | 11   | 18.1%                | 2.2%     | 51.7%    |
|                |                               | Min   | 10   | 12   | 25.0%                | 5.4%     | 57.1%    |
|                |                               | Min   | 11   | 11   | 27.2%                | 6.0%     | 60.9%    |
|                |                               | Min   | 14   | 12   | 16.6%                | 2.0%     | 48.4%    |
|                |                               | Min   | 25   | 12   | 16.6%                | 2.0%     | 48.4%    |
|                |                               | Mod   | 1    | 12   | 41.6%                | 15.1%    | 72.3%    |
|                |                               | Mod   | 6    | 9    | 55.5%                | 21.2%    | 86.3%    |
|                |                               | Mod   | 7    | 12   | 58.3%                | 27.6%    | 84.8%    |
|                |                               | Mod   | 8    | 11   | 45.4%                | 16.7%    | 76.6%    |
|                |                               | Mod   | 9    | 11   | 54.5%                | 23.3%    | 83.2%    |
|                |                               | Mod   | 10   | 12   | 58.3%                | 27.6%    | 84.8%    |
|                |                               | Mod   | 11   | 10   | 50.0%                | 18.7%    | 81.2%    |
|                |                               | Mod   | 14   | 12   | 41.6%                | 15.1%    | 72.3%    |

|                |                           |     |      |      |       |       |       |
|----------------|---------------------------|-----|------|------|-------|-------|-------|
| <i>E. coli</i> | Ampicillin<br>(continued) | Mod | 25   | 12   | 25.0% | 5.4%  | 5.7%  |
|                |                           | Int | 1    | 9    | 44.4% | 13.7% | 78.8% |
|                |                           | Int | 6    | 11   | 36.3% | 10.9% | 69.2% |
|                |                           | Int | 7    | 11   | 45.4% | 16.7% | 76.6% |
|                |                           | Int | 8    | 11   | 18.1% | 2.2%  | 51.7% |
|                |                           | Int | 9    | 12   | 8.3%  | 0.2%  | 38.4% |
|                |                           | Int | 10   | 12   | 50.0% | 21.0% | 78.9% |
|                |                           | Int | 11   | 11   | 36.3% | 10.9% | 69.2% |
|                |                           | Int | 14   | 12   | 33.3% | 9.9%  | 65.1% |
|                |                           | Int | 25   | 12   | 50.0% | 21.0% | 78.9% |
| <i>E. coli</i> | Azithromycin              | Min | 1    | 12   | 0%    | 0%    | 26.5% |
|                |                           | Min | 6    | 11   | 0%    | 0%    | 28.5% |
|                |                           | Min | 7    | 12   | 0%    | 0%    | 26.5% |
|                |                           | Min | 8    | 12   | 0%    | 0%    | 26.5% |
|                |                           | Min | 9    | 11   | 0%    | 0%    | 28.5% |
|                |                           | Min | 10   | 12   | 0%    | 0%    | 26.5% |
|                |                           | Min | 11   | 11   | 0%    | 0%    | 28.5% |
|                |                           | Min | 14   | 12   | 0%    | 0%    | 26.5% |
|                |                           | Min | 25   | 12   | 0%    | 0%    | 26.5% |
|                |                           | Mod | 1    | 12   | 0%    | 0%    | 26.5% |
|                |                           | Mod | 6    | 9    | 0%    | 0%    | 33.6% |
|                |                           | Mod | 7    | 12   | 0%    | 0%    | 26.5% |
|                |                           | Mod | 8    | 11   | 0%    | 0%    | 28.5% |
|                |                           | Mod | 9    | 11   | 0%    | 0%    | 28.5% |
|                |                           | Mod | 10   | 12   | 0%    | 0%    | 26.5% |
|                |                           | Mod | 11   | 10   | 0%    | 0%    | 30.8% |
|                |                           | Mod | 14   | 12   | 0%    | 0%    | 26.5% |
|                |                           | Mod | 25   | 12   | 0%    | 0%    | 26.5% |
|                |                           | Int | 1    | 9    | 0%    | 0%    | 33.6% |
|                |                           | Int | 6    | 11   | 0%    | 0%    | 28.5% |
| Int            | 7                         | 11  | 0%   | 0%   | 28.5% |       |       |
| Int            | 8                         | 11  | 9.0% | 0.2% | 41.2% |       |       |
| Int            | 9                         | 12  | 0%   | 0%   | 26.5% |       |       |
| Int            | 10                        | 12  | 0%   | 0%   | 26.5% |       |       |
| Int            | 11                        | 11  | 0%   | 0%   | 28.5% |       |       |
| Int            | 14                        | 12  | 0%   | 0%   | 26.5% |       |       |
| Int            | 25                        | 12  | 0%   | 0%   | 26.5% |       |       |
| <i>E. coli</i> | Cefoxitin                 | Min | 1    | 12   | 16.6% | 2.0%  | 48.4% |
|                |                           | Min | 6    | 11   | 9.0%  | 0.2%  | 41.2% |
|                |                           | Min | 7    | 12   | 0%    | 0%    | 26.5% |
|                |                           | Min | 8    | 12   | 0%    | 0%    | 26.5% |
|                |                           | Min | 9    | 11   | 9.0%  | 0.2%  | 41.2% |
|                |                           | Min | 10   | 12   | 0%    | 0%    | 26.5% |
|                |                           | Min | 11   | 11   | 0%    | 0%    | 28.5% |
|                |                           | Min | 14   | 12   | 0%    | 0%    | 26.5% |
|                |                           | Min | 25   | 12   | 0%    | 0%    | 26.5% |
|                |                           | Mod | 1    | 12   | 0%    | 0%    | 26.5% |

|                |                          |                |           |      |       |      |       |      |       |
|----------------|--------------------------|----------------|-----------|------|-------|------|-------|------|-------|
| <i>E. coli</i> | Cefoxitin<br>(continued) | Mod            | 6         | 9    | 0%    | 0%   | 33.6% |      |       |
|                |                          | Mod            | 7         | 12   | 0%    | 0%   | 26.5% |      |       |
|                |                          | Mod            | 8         | 11   | 0%    | 0%   | 28.5% |      |       |
|                |                          | Mod            | 9         | 11   | 0%    | 0%   | 28.5% |      |       |
|                |                          | Mod            | 10        | 12   | 0%    | 0%   | 26.5% |      |       |
|                |                          | Mod            | 11        | 10   | 0%    | 0%   | 30.8% |      |       |
|                |                          | Mod            | 14        | 12   | 0%    | 0%   | 26.5% |      |       |
|                |                          | Mod            | 25        | 12   | 0%    | 0%   | 26.5% |      |       |
|                |                          | Int            | 1         | 9    | 0%    | 0%   | 33.6% |      |       |
|                |                          | Int            | 6         | 11   | 0%    | 0%   | 28.5% |      |       |
|                |                          | Int            | 7         | 11   | 0%    | 0%   | 28.5% |      |       |
|                |                          | Int            | 8         | 11   | 0%    | 0%   | 28.5% |      |       |
|                |                          | Int            | 9         | 12   | 0%    | 0%   | 26.5% |      |       |
|                |                          | Int            | 10        | 12   | 0%    | 0%   | 26.5% |      |       |
|                |                          | Int            | 11        | 11   | 0%    | 0%   | 28.5% |      |       |
|                |                          | Int            | 14        | 12   | 0%    | 0%   | 26.5% |      |       |
|                |                          | Int            | 25        | 12   | 8.3%  | 0.2% | 38.4% |      |       |
|                |                          | <i>E. coli</i> | Ceftiofur | Min  | 1     | 12   | 16.6% | 2.0% | 48.4% |
|                |                          |                |           | Min  | 6     | 11   | 9.0%  | 0.2% | 41.2% |
| Min            | 7                        |                |           | 12   | 0%    | 0%   | 26.5% |      |       |
| Min            | 8                        |                |           | 12   | 0%    | 0%   | 26.5% |      |       |
| Min            | 9                        |                |           | 11   | 9.0%  | 0.2% | 41.2% |      |       |
| Min            | 10                       |                |           | 12   | 0%    | 0%   | 26.5% |      |       |
| Min            | 11                       |                |           | 11   | 0%    | 0%   | 28.5% |      |       |
| Min            | 14                       |                |           | 12   | 0%    | 0%   | 26.5% |      |       |
| Min            | 25                       |                |           | 12   | 0%    | 0%   | 26.5% |      |       |
| Mod            | 1                        |                |           | 12   | 0%    | 0%   | 26.5% |      |       |
| Mod            | 6                        |                |           | 9    | 0%    | 0%   | 33.6% |      |       |
| Mod            | 7                        |                |           | 12   | 0%    | 0%   | 26.5% |      |       |
| Mod            | 8                        |                |           | 11   | 0%    | 0%   | 28.5% |      |       |
| Mod            | 9                        |                |           | 11   | 0%    | 0%   | 28.5% |      |       |
| Mod            | 10                       |                |           | 12   | 0%    | 0%   | 26.5% |      |       |
| Mod            | 11                       |                |           | 10   | 0%    | 0%   | 30.8% |      |       |
| Mod            | 14                       |                |           | 12   | 0%    | 0%   | 26.5% |      |       |
| Mod            | 25                       |                |           | 12   | 0%    | 0%   | 26.5% |      |       |
| Int            | 1                        |                |           | 9    | 0%    | 0%   | 33.6% |      |       |
| Int            | 6                        |                |           | 11   | 0%    | 0%   | 28.5% |      |       |
| Int            | 7                        |                |           | 11   | 0%    | 0%   | 28.5% |      |       |
| Int            | 8                        |                |           | 11   | 0%    | 0%   | 28.5% |      |       |
| Int            | 9                        |                |           | 12   | 0%    | 0%   | 26.5% |      |       |
| Int            | 10                       |                |           | 12   | 0%    | 0%   | 26.5% |      |       |
| Int            | 11                       |                |           | 11   | 0%    | 0%   | 28.5% |      |       |
| Int            | 14                       | 12             | 0%        | 0%   | 26.5% |      |       |      |       |
| Int            | 25                       | 12             | 8.3%      | 0.2% | 38.4% |      |       |      |       |
| <i>E. coli</i> | Ceftriaxone              | Min            | 1         | 12   | 16.6% | 2.0% | 48.4% |      |       |
|                |                          | Min            | 6         | 11   | 9.0%  | 0.2% | 41.2% |      |       |
|                |                          | Min            | 7         | 12   | 0%    | 0%   | 26.5% |      |       |

|                |                            |     |       |      |       |      |       |
|----------------|----------------------------|-----|-------|------|-------|------|-------|
| <i>E. coli</i> | Ceftriaxone<br>(continued) | Min | 8     | 12   | 0%    | 0%   | 26.5% |
|                |                            | Min | 9     | 11   | 9.0%  | 0.2% | 41.2% |
|                |                            | Min | 10    | 12   | 0%    | 0%   | 26.5% |
|                |                            | Min | 11    | 11   | 0%    | 0%   | 28.5% |
|                |                            | Min | 14    | 12   | 0%    | 0%   | 26.5% |
|                |                            | Min | 25    | 12   | 0%    | 0%   | 26.5% |
|                |                            | Mod | 1     | 12   | 0%    | 0%   | 26.5% |
|                |                            | Mod | 6     | 9    | 0%    | 0%   | 33.6% |
|                |                            | Mod | 7     | 12   | 0%    | 0%   | 26.5% |
|                |                            | Mod | 8     | 11   | 0%    | 0%   | 28.5% |
|                |                            | Mod | 9     | 11   | 0%    | 0%   | 28.5% |
|                |                            | Mod | 10    | 12   | 0%    | 0%   | 26.5% |
|                |                            | Mod | 11    | 10   | 0%    | 0%   | 30.8% |
|                |                            | Mod | 14    | 12   | 0%    | 0%   | 26.5% |
|                |                            | Mod | 25    | 12   | 0%    | 0%   | 26.5% |
|                |                            | Int | 1     | 9    | 0%    | 0%   | 33.6% |
|                |                            | Int | 6     | 11   | 0%    | 0%   | 28.5% |
|                |                            | Int | 7     | 11   | 0%    | 0%   | 28.5% |
|                |                            | Int | 8     | 11   | 0%    | 0%   | 28.5% |
|                |                            | Int | 9     | 12   | 0%    | 0%   | 26.5% |
| <i>E. coli</i> | Chloramphenicol            | Min | 1     | 12   | 8.3%  | 0.2% | 38.4% |
|                |                            | Min | 6     | 11   | 9.0%  | 0.2% | 41.2% |
|                |                            | Min | 7     | 12   | 8.3%  | 0.2% | 38.4% |
|                |                            | Min | 8     | 12   | 8.3%  | 0.2% | 38.4% |
|                |                            | Min | 9     | 11   | 0%    | 0%   | 28.5% |
|                |                            | Min | 10    | 12   | 0%    | 0%   | 26.5% |
|                |                            | Min | 11    | 11   | 9.0%  | 0.2% | 41.2% |
|                |                            | Min | 14    | 12   | 16.6% | 2.0% | 48.4% |
|                |                            | Min | 25    | 12   | 16.6% | 2.0% | 48.4% |
|                |                            | Mod | 1     | 12   | 0%    | 0%   | 26.5% |
|                |                            | Mod | 6     | 9    | 0%    | 0%   | 33.6% |
|                |                            | Mod | 7     | 12   | 0%    | 0%   | 26.5% |
|                |                            | Mod | 8     | 11   | 9.0%  | 0.2% | 41.2% |
|                |                            | Mod | 9     | 11   | 0%    | 0%   | 28.5% |
|                |                            | Mod | 10    | 12   | 8.3%  | 0.2% | 38.4% |
|                |                            | Mod | 11    | 10   | 0%    | 0%   | 30.8% |
|                |                            | Mod | 14    | 12   | 8.3%  | 0.2% | 38.4% |
|                |                            | Mod | 25    | 12   | 0%    | 0%   | 26.5% |
|                |                            | Int | 1     | 9    | 11.0% | 0.2% | 48.2% |
|                |                            | Int | 6     | 11   | 0%    | 0%   | 28.5% |
| Int            | 7                          | 11  | 0%    | 0%   | 28.5% |      |       |
| Int            | 8                          | 11  | 0%    | 0%   | 28.5% |      |       |
| Int            | 9                          | 12  | 16.6% | 2.0% | 48.4% |      |       |

|                |                                |     |    |    |       |      |       |
|----------------|--------------------------------|-----|----|----|-------|------|-------|
| <i>E. coli</i> | Chloramphenicol<br>(continued) | Int | 10 | 12 | 8.3%  | 0.2% | 38.4% |
|                |                                | Int | 11 | 11 | 9.0%  | 0.2% | 41.2% |
|                |                                | Int | 14 | 12 | 16.6% | 2.0% | 48.4% |
|                |                                | Int | 25 | 12 | 16.6% | 2.0% | 48.4% |
| <i>E. coli</i> | Ciprofloxacin                  | Min | 1  | 12 | 0%    | 0%   | 26.5% |
|                |                                | Min | 6  | 11 | 0%    | 0%   | 28.5% |
|                |                                | Min | 7  | 12 | 0%    | 0%   | 26.5% |
|                |                                | Min | 8  | 12 | 0%    | 0%   | 26.5% |
|                |                                | Min | 9  | 11 | 0%    | 0%   | 28.5% |
|                |                                | Min | 10 | 12 | 0%    | 0%   | 26.5% |
|                |                                | Min | 11 | 11 | 0%    | 0%   | 28.5% |
|                |                                | Min | 14 | 12 | 0%    | 0%   | 26.5% |
|                |                                | Min | 25 | 12 | 0%    | 0%   | 26.5% |
|                |                                | Mod | 1  | 12 | 0%    | 0%   | 26.5% |
|                |                                | Mod | 6  | 9  | 0%    | 0%   | 33.6% |
|                |                                | Mod | 7  | 12 | 0%    | 0%   | 26.5% |
|                |                                | Mod | 8  | 11 | 0%    | 0%   | 28.5% |
|                |                                | Mod | 9  | 11 | 0%    | 0%   | 28.5% |
|                |                                | Mod | 10 | 12 | 0%    | 0%   | 26.5% |
|                |                                | Mod | 11 | 10 | 0%    | 0%   | 30.8% |
|                |                                | Mod | 14 | 12 | 0%    | 0%   | 26.5% |
|                |                                | Mod | 25 | 12 | 0%    | 0%   | 26.5% |
|                |                                | Int | 1  | 9  | 0%    | 0%   | 33.6% |
|                |                                | Int | 6  | 11 | 0%    | 0%   | 28.5% |
|                |                                | Int | 7  | 11 | 9.0%  | 0.2% | 41.2% |
|                |                                | Int | 8  | 11 | 0%    | 0%   | 28.5% |
|                |                                | Int | 9  | 12 | 0%    | 0%   | 26.5% |
|                |                                | Int | 10 | 12 | 0%    | 0%   | 26.5% |
| Int            | 11                             | 11  | 0% | 0% | 28.5% |      |       |
| Int            | 14                             | 12  | 0% | 0% | 26.5% |      |       |
| Int            | 25                             | 12  | 0% | 0% | 26.5% |      |       |
| <i>E. coli</i> | Gentamicin                     | Min | 1  | 12 | 8.3%  | 0.2% | 38.4% |
|                |                                | Min | 6  | 11 | 0%    | 0%   | 28.5% |
|                |                                | Min | 7  | 12 | 0%    | 0%   | 26.5% |
|                |                                | Min | 8  | 12 | 0%    | 0%   | 26.5% |
|                |                                | Min | 9  | 11 | 0%    | 0%   | 28.5% |
|                |                                | Min | 10 | 12 | 0%    | 0%   | 26.5% |
|                |                                | Min | 11 | 11 | 0%    | 0%   | 28.5% |
|                |                                | Min | 14 | 12 | 0%    | 0%   | 26.5% |
|                |                                | Min | 25 | 12 | 0%    | 0%   | 26.5% |
|                |                                | Mod | 1  | 12 | 0%    | 0%   | 26.5% |
|                |                                | Mod | 6  | 9  | 0%    | 0%   | 33.6% |
|                |                                | Mod | 7  | 12 | 8.3%  | 0.2% | 38.4% |
|                |                                | Mod | 8  | 11 | 0%    | 0%   | 28.5% |
|                |                                | Mod | 9  | 11 | 0%    | 0%   | 28.5% |
|                |                                | Mod | 10 | 12 | 0%    | 0%   | 26.5% |
|                |                                | Mod | 11 | 10 | 0%    | 0%   | 30.8% |



|                |                           |     |      |      |       |       |       |
|----------------|---------------------------|-----|------|------|-------|-------|-------|
| <i>E. coli</i> | Gentamicin<br>(continued) | Mod | 14   | 12   | 0%    | 0%    | 26.5% |
|                |                           | Mod | 25   | 12   | 0%    | 0%    | 26.5% |
|                |                           | Int | 1    | 9    | 0%    | 0%    | 33.6% |
|                |                           | Int | 6    | 11   | 0%    | 0%    | 28.5% |
|                |                           | Int | 7    | 11   | 9.0%  | 0.2%  | 41.2% |
|                |                           | Int | 8    | 11   | 0%    | 0%    | 28.5% |
|                |                           | Int | 9    | 12   | 0%    | 0%    | 26.5% |
|                |                           | Int | 10   | 12   | 0%    | 0%    | 26.5% |
|                |                           | Int | 11   | 11   | 0%    | 0%    | 28.5% |
|                |                           | Int | 14   | 12   | 0%    | 0%    | 26.5% |
|                |                           | Int | 25   | 12   | 8.3%  | 0.2%  | 38.4% |
| <i>E. coli</i> | Nalidixic Acid            | Min | 1    | 12   | 8.3%  | 0.2%  | 38.4% |
|                |                           | Min | 6    | 11   | 0%    | 0%    | 28.5% |
|                |                           | Min | 7    | 12   | 0%    | 0%    | 26.5% |
|                |                           | Min | 8    | 12   | 0%    | 0%    | 26.5% |
|                |                           | Min | 9    | 11   | 0%    | 0%    | 28.5% |
|                |                           | Min | 10   | 12   | 0%    | 0%    | 26.5% |
|                |                           | Min | 11   | 11   | 0%    | 0%    | 28.5% |
|                |                           | Min | 14   | 12   | 0%    | 0%    | 26.5% |
|                |                           | Min | 25   | 12   | 0%    | 0%    | 26.5% |
|                |                           | Mod | 1    | 12   | 0%    | 0%    | 26.5% |
|                |                           | Mod | 6    | 9    | 0%    | 0%    | 33.6% |
|                |                           | Mod | 7    | 12   | 0%    | 0%    | 26.5% |
|                |                           | Mod | 8    | 11   | 0%    | 0%    | 28.5% |
|                |                           | Mod | 9    | 11   | 0%    | 0%    | 28.5% |
|                |                           | Mod | 10   | 12   | 0%    | 0%    | 26.5% |
|                |                           | Mod | 11   | 10   | 0%    | 0%    | 30.8% |
|                |                           | Mod | 14   | 12   | 0%    | 0%    | 26.5% |
|                |                           | Mod | 25   | 12   | 0%    | 0%    | 26.5% |
|                |                           | Int | 1    | 9    | 0%    | 0%    | 33.6% |
|                |                           | Int | 6    | 11   | 9.0%  | 0.2%  | 41.2% |
|                |                           | Int | 7    | 11   | 9.0%  | 0.2%  | 41.2% |
|                |                           | Int | 8    | 11   | 0%    | 0%    | 28.5% |
|                |                           | Int | 9    | 12   | 0%    | 0%    | 26.5% |
|                |                           | Int | 10   | 12   | 0%    | 0%    | 26.5% |
|                |                           | Int | 11   | 11   | 9.0%  | 0.2%  | 41.2% |
| Int            | 14                        | 12  | 8.3% | 0.2% | 38.4% |       |       |
| Int            | 25                        | 12  | 0%   | 0%   | 26.5% |       |       |
| <i>E. coli</i> | Streptomycin              | Min | 1    | 12   | 50.0% | 21.0% | 78.9% |
|                |                           | Min | 6    | 11   | 18.1% | 2.2%  | 51.7% |
|                |                           | Min | 7    | 12   | 25.0% | 5.4%  | 57.1% |
|                |                           | Min | 8    | 12   | 25.0% | 5.4%  | 57.1% |
|                |                           | Min | 9    | 11   | 0.0%  | 0%    | 28.5% |
|                |                           | Min | 10   | 12   | 16.6% | 2.0%  | 48.4% |
|                |                           | Min | 11   | 11   | 27.2% | 6.0%  | 60.9% |
|                |                           | Min | 14   | 12   | 25.0% | 5.4%  | 57.1% |
|                |                           | Min | 25   | 12   | 25.0% | 5.4%  | 57.1% |

|                |                             |                |               |      |       |       |       |      |       |
|----------------|-----------------------------|----------------|---------------|------|-------|-------|-------|------|-------|
| <i>E. coli</i> | Streptomycin<br>(continued) | Mod            | 1             | 12   | 66.6% | 34.8% | 90.0% |      |       |
|                |                             | Mod            | 6             | 9    | 55.5% | 21.2% | 86.3% |      |       |
|                |                             | Mod            | 7             | 12   | 66.6% | 34.8% | 90.0% |      |       |
|                |                             | Mod            | 8             | 11   | 63.6% | 30.7% | 89.0% |      |       |
|                |                             | Mod            | 9             | 11   | 72.7% | 39.0% | 93.9% |      |       |
|                |                             | Mod            | 10            | 12   | 58.3% | 27.6% | 84.8% |      |       |
|                |                             | Mod            | 11            | 10   | 60.0% | 26.2% | 87.8% |      |       |
|                |                             | Mod            | 14            | 12   | 66.6% | 34.8% | 90.0% |      |       |
|                |                             | Mod            | 25            | 12   | 33.3% | 9.9%  | 65.1% |      |       |
|                |                             | Int            | 1             | 9    | 44.4% | 13.7% | 78.8% |      |       |
|                |                             | Int            | 6             | 11   | 45.4% | 16.7% | 76.6% |      |       |
|                |                             | Int            | 7             | 11   | 36.3% | 10.9% | 69.2% |      |       |
|                |                             | Int            | 8             | 11   | 27.2% | 6.0%  | 60.9% |      |       |
|                |                             | Int            | 9             | 12   | 25.0% | 5.4%  | 57.1% |      |       |
|                |                             | Int            | 10            | 12   | 8.3%  | 0.2%  | 38.4% |      |       |
|                |                             | Int            | 11            | 11   | 18.1% | 2.2%  | 51.7% |      |       |
|                |                             | Int            | 14            | 12   | 0%    | 0%    | 26.5% |      |       |
|                |                             | Int            | 25            | 12   | 0%    | 0%    | 26.5% |      |       |
|                |                             | <i>E. coli</i> | Sulfisoxazole | Min  | 1     | 12    | 16.6% | 2.0% | 48.4% |
|                |                             |                |               | Min  | 6     | 11    | 27.2% | 6.0% | 60.9% |
| Min            | 7                           |                |               | 12   | 8.3%  | 0.2%  | 38.4% |      |       |
| Min            | 8                           |                |               | 12   | 33.3% | 9.9%  | 65.1% |      |       |
| Min            | 9                           |                |               | 11   | 0%    | 0%    | 28.5% |      |       |
| Min            | 10                          |                |               | 12   | 0%    | 0%    | 26.5% |      |       |
| Min            | 11                          |                |               | 11   | 18.1% | 2.2%  | 51.7% |      |       |
| Min            | 14                          |                |               | 12   | 16.6% | 2.0%  | 48.4% |      |       |
| Min            | 25                          |                |               | 12   | 16.6% | 2.0%  | 48.4% |      |       |
| Mod            | 1                           |                |               | 12   | 8.3%  | 0.2%  | 38.4% |      |       |
| Mod            | 6                           |                |               | 9    | 22.2% | 2.8%  | 60.0% |      |       |
| Mod            | 7                           |                |               | 12   | 8.3%  | 0.2%  | 38.4% |      |       |
| Mod            | 8                           |                |               | 11   | 18.1% | 2.0%  | 51.7% |      |       |
| Mod            | 9                           |                |               | 11   | 9.0%  | 0.2%  | 41.2% |      |       |
| Mod            | 10                          |                |               | 12   | 16.6% | 2.0%  | 48.4% |      |       |
| Mod            | 11                          |                |               | 10   | 0%    | 0%    | 30.8% |      |       |
| Mod            | 14                          |                |               | 12   | 8.3%  | 0.2%  | 38.4% |      |       |
| Mod            | 25                          |                |               | 12   | 0%    | 0%    | 26.5% |      |       |
| Int            | 1                           |                |               | 9    | 11.1% | 0.3%  | 48.2% |      |       |
| Int            | 6                           |                |               | 11   | 18.1% | 2.2%  | 51.7% |      |       |
| Int            | 7                           |                |               | 11   | 9.0%  | 0.2%  | 41.2% |      |       |
| Int            | 8                           |                |               | 11   | 9.0%  | 0.2%  | 41.2% |      |       |
| Int            | 9                           |                |               | 12   | 25.0% | 5.4%  | 57.1% |      |       |
| Int            | 10                          |                |               | 12   | 16.6% | 2.0%  | 48.4% |      |       |
| Int            | 11                          |                |               | 11   | 9.0%  | 0.2%  | 41.2% |      |       |
| Int            | 14                          | 12             | 16.6%         | 2.0% | 48.4% |       |       |      |       |
| Int            | 25                          | 12             | 16.6%         | 2.0% | 48.4% |       |       |      |       |
| <i>E. coli</i> | Tetracycline                | Min            | 1             | 12   | 83.3% | 51.5% | 97.9% |      |       |
|                |                             | Min            | 6             | 11   | 81.8% | 48.2% | 97.7% |      |       |

|                |                             |                |                    |     |       |       |       |    |       |
|----------------|-----------------------------|----------------|--------------------|-----|-------|-------|-------|----|-------|
| <i>E. coli</i> | Tetracycline<br>(continued) | Min            | 7                  | 12  | 83.3% | 51.5% | 97.9% |    |       |
|                |                             | Min            | 8                  | 12  | 75.0% | 42.8% | 94.5% |    |       |
|                |                             | Min            | 9                  | 11  | 72.7% | 39.0% | 93.9% |    |       |
|                |                             | Min            | 10                 | 12  | 91.6% | 61.5% | 99.7% |    |       |
|                |                             | Min            | 11                 | 11  | 90.9% | 58.7% | 99.7% |    |       |
|                |                             | Min            | 14                 | 12  | 83.3% | 51.5% | 97.9% |    |       |
|                |                             | Min            | 25                 | 12  | 91.6% | 61.5% | 99.7% |    |       |
|                |                             | Mod            | 1                  | 12  | 91.6% | 61.5% | 99.7% |    |       |
|                |                             | Mod            | 6                  | 9   | 100%  | 66.3% | 100%  |    |       |
|                |                             | Mod            | 7                  | 12  | 91.6% | 61.5% | 99.7% |    |       |
|                |                             | Mod            | 8                  | 11  | 100%  | 71.5% | 100%  |    |       |
|                |                             | Mod            | 9                  | 11  | 81.8% | 48.2% | 97.7% |    |       |
|                |                             | Mod            | 10                 | 12  | 91.6% | 61.5% | 99.7% |    |       |
|                |                             | Mod            | 11                 | 10  | 90.0% | 55.5% | 99.7% |    |       |
|                |                             | Mod            | 14                 | 12  | 91.6% | 61.5% | 99.7% |    |       |
|                |                             | Mod            | 25                 | 12  | 83.3% | 51.5% | 97.9% |    |       |
|                |                             | Int            | 1                  | 9   | 100%  | 66.3% | 100%  |    |       |
|                |                             | Int            | 6                  | 11  | 81.8% | 48.2% | 97.7% |    |       |
|                |                             | Int            | 7                  | 11  | 90.9% | 58.7% | 99.7% |    |       |
|                |                             | Int            | 8                  | 11  | 81.8% | 48.2% | 97.7% |    |       |
|                |                             | Int            | 9                  | 12  | 100%  | 73.5% | 100%  |    |       |
|                |                             | Int            | 10                 | 12  | 100%  | 73.5% | 100%  |    |       |
|                |                             | Int            | 11                 | 11  | 90.9% | 58.7% | 99.7% |    |       |
|                |                             | Int            | 14                 | 12  | 91.6% | 61.5% | 99.7% |    |       |
|                |                             | Int            | 25                 | 12  | 100%  | 73.5% | 100%  |    |       |
|                |                             | <i>E. coli</i> | Trimethoprim/Sulfa | Min | 1     | 12    | 0%    | 0% | 26.5% |
|                |                             |                |                    | Min | 6     | 11    | 0%    | 0% | 28.5% |
| Min            | 7                           |                |                    | 12  | 0%    | 0%    | 26.5% |    |       |
| Min            | 8                           |                |                    | 12  | 0%    | 0%    | 26.5% |    |       |
| Min            | 9                           |                |                    | 11  | 0%    | 0%    | 28.5% |    |       |
| Min            | 10                          |                |                    | 12  | 0%    | 0%    | 26.5% |    |       |
| Min            | 11                          |                |                    | 11  | 0%    | 0%    | 28.5% |    |       |
| Min            | 14                          |                |                    | 12  | 0%    | 0%    | 26.5% |    |       |
| Min            | 25                          |                |                    | 12  | 0%    | 0%    | 26.5% |    |       |
| Mod            | 1                           |                |                    | 12  | 0%    | 0%    | 26.5% |    |       |
| Mod            | 6                           |                |                    | 9   | 0%    | 0%    | 33.6% |    |       |
| Mod            | 7                           |                |                    | 12  | 0%    | 0%    | 26.5% |    |       |
| Mod            | 8                           |                |                    | 11  | 0%    | 0%    | 28.5% |    |       |
| Mod            | 9                           |                |                    | 11  | 0%    | 0%    | 28.5% |    |       |
| Mod            | 10                          |                |                    | 12  | 0%    | 0%    | 26.5% |    |       |
| Mod            | 11                          |                |                    | 10  | 0%    | 0%    | 30.8% |    |       |
| Mod            | 14                          |                |                    | 12  | 0%    | 0%    | 26.5% |    |       |
| Mod            | 25                          |                |                    | 12  | 0%    | 0%    | 26.5% |    |       |
| Int            | 1                           |                |                    | 9   | 0%    | 0%    | 33.6% |    |       |
| Int            | 6                           |                |                    | 11  | 0%    | 0%    | 28.5% |    |       |
| Int            | 7                           | 11             | 0%                 | 0%  | 28.5% |       |       |    |       |
| Int            | 8                           | 11             | 0%                 | 0%  | 28.5% |       |       |    |       |

|                     |                                   |     |    |    |       |       |       |
|---------------------|-----------------------------------|-----|----|----|-------|-------|-------|
| <i>E. coli</i>      | Trimethoprim/Sulfa<br>(continued) | Int | 9  | 12 | 16.6% | 2.0%  | 48.4% |
|                     |                                   | Int | 10 | 12 | 8.3%  | 0.2%  | 38.4% |
|                     |                                   | Int | 11 | 11 | 9.0%  | 0.2%  | 41.2% |
|                     |                                   | Int | 14 | 12 | 16.6% | 2.0%  | 48.4% |
|                     |                                   | Int | 25 | 12 | 8.3%  | 0.2%  | 38.4% |
| <i>Enterococcus</i> | Chloramphenicol                   | Min | 1  | 12 | 0%    | 0%    | 26.5% |
|                     |                                   | Min | 6  | 10 | 0%    | 0%    | 30.8% |
|                     |                                   | Min | 7  | 12 | 0%    | 0%    | 26.5% |
|                     |                                   | Min | 8  | 7  | 0%    | 0%    | 41.0% |
|                     |                                   | Min | 9  | 12 | 0%    | 0%    | 26.5% |
|                     |                                   | Min | 10 | 12 | 0%    | 0%    | 26.5% |
|                     |                                   | Min | 11 | 11 | 0%    | 0%    | 28.5% |
|                     |                                   | Min | 14 | 12 | 0%    | 0%    | 26.5% |
|                     |                                   | Min | 25 | 12 | 0%    | 0%    | 26.5% |
|                     |                                   | Mod | 1  | 12 | 0%    | 0%    | 26.5% |
|                     |                                   | Mod | 6  | 12 | 0%    | 0%    | 26.5% |
|                     |                                   | Mod | 7  | 10 | 0%    | 0%    | 30.8% |
|                     |                                   | Mod | 8  | 8  | 0%    | 0%    | 36.9% |
|                     |                                   | Mod | 9  | 10 | 0%    | 0%    | 30.8% |
|                     |                                   | Mod | 10 | 9  | 0%    | 0%    | 33.6% |
|                     |                                   | Mod | 11 | 10 | 10.0% | 0.2%  | 44.5% |
|                     |                                   | Mod | 14 | 9  | 0%    | 0%    | 33.6% |
|                     |                                   | Mod | 25 | 11 | 0%    | 0%    | 28.5% |
|                     |                                   | Int | 1  | 12 | 0%    | 0%    | 26.5% |
|                     |                                   | Int | 6  | 11 | 0%    | 0%    | 28.5% |
|                     |                                   | Int | 7  | 9  | 0%    | 0%    | 33.6% |
|                     |                                   | Int | 8  | 12 | 0%    | 0%    | 26.5% |
|                     |                                   | Int | 9  | 11 | 0%    | 0%    | 28.5% |
|                     |                                   | Int | 10 | 11 | 0%    | 0%    | 28.5% |
|                     |                                   | Int | 11 | 12 | 0%    | 0%    | 26.5% |
| Int                 | 14                                | 12  | 0% | 0% | 26.5% |       |       |
| Int                 | 25                                | 11  | 0% | 0% | 28.5% |       |       |
| <i>Enterococcus</i> | Ciprofloxacin                     | Min | 1  | 12 | 8.3%  | 0.2%  | 38.4% |
|                     |                                   | Min | 6  | 10 | 50.0% | 18.7% | 81.2% |
|                     |                                   | Min | 7  | 12 | 50.0% | 21.0% | 78.9% |
|                     |                                   | Min | 8  | 7  | 14.2% | 0.3%  | 57.8% |
|                     |                                   | Min | 9  | 12 | 16.6% | 2.0%  | 48.4% |
|                     |                                   | Min | 10 | 12 | 0%    | 0%    | 26.5% |
|                     |                                   | Min | 11 | 11 | 18.1% | 2.2%  | 51.7% |
|                     |                                   | Min | 14 | 12 | 0%    | 0%    | 26.5% |
|                     |                                   | Min | 25 | 12 | 0%    | 0%    | 26.5% |
|                     |                                   | Mod | 1  | 12 | 16.6% | 2.0%  | 48.4% |
|                     |                                   | Mod | 6  | 12 | 8.3%  | 0.2%  | 38.4% |
|                     |                                   | Mod | 7  | 10 | 10.0% | 0.2%  | 44.5% |
|                     |                                   | Mod | 8  | 8  | 0%    | 0%    | 36.9% |
|                     |                                   | Mod | 9  | 10 | 10.0% | 0.2%  | 44.5% |
|                     |                                   | Mod | 10 | 9  | 0%    | 0%    | 33.6% |

|                     |                              |                     |            |      |       |       |       |
|---------------------|------------------------------|---------------------|------------|------|-------|-------|-------|
| <i>Enterococcus</i> | Ciprofloxacin<br>(continued) | Mod                 | 11         | 10   | 10.0% | 0.2%  | 44.5% |
|                     |                              | Mod                 | 14         | 9    | 0%    | 0%    | 33.6% |
|                     |                              | Mod                 | 25         | 11   | 0%    | 0%    | 28.5% |
|                     |                              | Int                 | 1          | 12   | 0%    | 0%    | 26.5% |
|                     |                              | Int                 | 6          | 11   | 9.0%  | 0.2%  | 41.2% |
|                     |                              | Int                 | 7          | 9    | 0%    | 0%    | 33.6% |
|                     |                              | Int                 | 8          | 12   | 0%    | 0%    | 26.5% |
|                     |                              | Int                 | 9          | 11   | 0%    | 0%    | 28.5% |
|                     |                              | Int                 | 10         | 11   | 0%    | 0%    | 28.5% |
|                     |                              | Int                 | 11         | 12   | 8.3%  | 0.2%  | 38.4% |
|                     |                              | Int                 | 14         | 12   | 16.6% | 2.0%  | 48.4% |
|                     |                              | Int                 | 25         | 11   | 18.1% | 2.0%  | 51.7% |
|                     |                              | <i>Enterococcus</i> | Daptomycin | Min  | 1     | 12    | 0%    |
| Min                 | 6                            |                     |            | 10   | 0%    | 0%    | 30.8% |
| Min                 | 7                            |                     |            | 12   | 0%    | 0%    | 26.5% |
| Min                 | 8                            |                     |            | 7    | 14.2% | 0.3%  | 57.8% |
| Min                 | 9                            |                     |            | 12   | 16.6% | 2.0%  | 48.4% |
| Min                 | 10                           |                     |            | 12   | 8.3%  | 0.2%  | 38.4% |
| Min                 | 11                           |                     |            | 11   | 0%    | 0%    | 28.5% |
| Min                 | 14                           |                     |            | 12   | 8.3%  | 0.2%  | 38.4% |
| Min                 | 25                           |                     |            | 12   | 0%    | 0%    | 26.5% |
| Mod                 | 1                            |                     |            | 12   | 8.3%  | 0.2%  | 38.4% |
| Mod                 | 6                            |                     |            | 12   | 0%    | 0%    | 26.5% |
| Mod                 | 7                            |                     |            | 10   | 0%    | 0%    | 30.8% |
| Mod                 | 8                            |                     |            | 8    | 0%    | 0%    | 36.9% |
| Mod                 | 9                            |                     |            | 10   | 0%    | 0%    | 30.8% |
| Mod                 | 10                           |                     |            | 9    | 11.1% | 0.2%  | 48.2% |
| Mod                 | 11                           |                     |            | 10   | 0%    | 0%    | 30.8% |
| Mod                 | 14                           |                     |            | 9    | 11.1% | 0.2%  | 48.2% |
| Mod                 | 25                           |                     |            | 11   | 9.0%  | 0.2%  | 41.2% |
| Int                 | 1                            |                     |            | 12   | 0%    | 0%    | 26.5% |
| Int                 | 6                            |                     |            | 11   | 0%    | 0%    | 28.5% |
| Int                 | 7                            |                     |            | 9    | 0%    | 0%    | 33.6% |
| Int                 | 8                            |                     |            | 12   | 0%    | 0%    | 26.5% |
| Int                 | 9                            |                     |            | 11   | 0%    | 0%    | 28.5% |
| Int                 | 10                           |                     |            | 11   | 0%    | 0%    | 28.5% |
| Int                 | 11                           |                     |            | 12   | 0%    | 0%    | 26.5% |
| Int                 | 14                           | 12                  | 8.3%       | 0.2% | 38.4% |       |       |
| Int                 | 25                           | 11                  | 0%         | 0%   | 28.5% |       |       |
| <i>Enterococcus</i> | Erythromycin                 | Min                 | 1          | 12   | 91.6% | 61.5% | 99.7% |
|                     |                              | Min                 | 6          | 10   | 30.0% | 6.6%  | 65.2% |
|                     |                              | Min                 | 7          | 12   | 16.6% | 2.0%  | 48.4% |
|                     |                              | Min                 | 8          | 7    | 0.0%  | 0%    | 41.0% |
|                     |                              | Min                 | 9          | 12   | 33.0% | 9.9%  | 65.1% |
|                     |                              | Min                 | 10         | 12   | 50.0% | 21.0% | 78.9% |
|                     |                              | Min                 | 11         | 11   | 54.5% | 23.3% | 83.2% |
|                     |                              | Min                 | 14         | 12   | 50.0% | 21.0% | 78.9% |

|                     |                             |                     |            |      |       |       |       |
|---------------------|-----------------------------|---------------------|------------|------|-------|-------|-------|
| <i>Enterococcus</i> | Erythromycin<br>(continued) | Min                 | 25         | 12   | 50.0% | 21.0% | 78.9% |
|                     |                             | Mod                 | 1          | 12   | 66.6% | 34.8% | 90.0% |
|                     |                             | Mod                 | 6          | 12   | 41.6% | 15.1% | 72.3% |
|                     |                             | Mod                 | 7          | 10   | 10.0% | 0.2%  | 44.5% |
|                     |                             | Mod                 | 8          | 8    | 50.0% | 15.7% | 84.3% |
|                     |                             | Mod                 | 9          | 10   | 50.0% | 18.7% | 81.2% |
|                     |                             | Mod                 | 10         | 9    | 33.3% | 7.4%  | 70.0% |
|                     |                             | Mod                 | 11         | 10   | 70.0% | 34.7% | 93.3% |
|                     |                             | Mod                 | 14         | 9    | 77.7% | 39.9% | 97.1% |
|                     |                             | Mod                 | 25         | 11   | 36.3% | 10.9% | 69.2% |
|                     |                             | Int                 | 1          | 12   | 66.6% | 34.8% | 90.0% |
|                     |                             | Int                 | 6          | 11   | 27.2% | 6.0%  | 60.9% |
|                     |                             | Int                 | 7          | 9    | 44.4% | 13.7% | 78.8% |
|                     |                             | Int                 | 8          | 12   | 58.3% | 27.6% | 84.8% |
|                     |                             | Int                 | 9          | 11   | 72.7% | 39.0% | 93.9% |
|                     |                             | Int                 | 10         | 11   | 36.3% | 10.9% | 69.2% |
|                     |                             | Int                 | 11         | 12   | 41.6% | 15.1% | 72.3% |
|                     |                             | Int                 | 14         | 12   | 33.3% | 9.9%  | 65.1% |
|                     |                             | Int                 | 25         | 11   | 45.4% | 16.7% | 76.6% |
|                     |                             | <i>Enterococcus</i> | Gentamycin | Min  | 1     | 12    | 0.0%  |
| Min                 | 6                           |                     |            | 10   | 0.0%  | 0%    | 30.8% |
| Min                 | 7                           |                     |            | 12   | 8.3%  | 0.2%  | 38.4% |
| Min                 | 8                           |                     |            | 7    | 0.0%  | 0%    | 41.0% |
| Min                 | 9                           |                     |            | 12   | 0.0%  | 0%    | 26.5% |
| Min                 | 10                          |                     |            | 12   | 0.0%  | 0%    | 26.5% |
| Min                 | 11                          |                     |            | 11   | 0.0%  | 0%    | 28.5% |
| Min                 | 14                          |                     |            | 12   | 0.0%  | 0%    | 26.5% |
| Min                 | 25                          |                     |            | 12   | 0.0%  | 0%    | 26.5% |
| Mod                 | 1                           |                     |            | 12   | 16.6% | 2.0%  | 48.4% |
| Mod                 | 6                           |                     |            | 12   | 0.0%  | 0%    | 26.5% |
| Mod                 | 7                           |                     |            | 10   | 0.0%  | 0%    | 30.8% |
| Mod                 | 8                           |                     |            | 8    | 0.0%  | 0%    | 36.9% |
| Mod                 | 9                           |                     |            | 10   | 10.0% | 0.2%  | 44.5% |
| Mod                 | 10                          |                     |            | 9    | 0.0%  | 0%    | 33.6% |
| Mod                 | 11                          |                     |            | 10   | 0.0%  | 0%    | 30.8% |
| Mod                 | 14                          |                     |            | 9    | 0.0%  | 0%    | 33.6% |
| Mod                 | 25                          |                     |            | 11   | 0.0%  | 0%    | 28.5% |
| Int                 | 1                           |                     |            | 12   | 8.3%  | 0.2%  | 38.4% |
| Int                 | 6                           |                     |            | 11   | 9.0%  | 0.2%  | 41.2% |
| Int                 | 7                           | 9                   | 0.0%       | 0%   | 33.6% |       |       |
| Int                 | 8                           | 12                  | 0.0%       | 0%   | 26.5% |       |       |
| Int                 | 9                           | 11                  | 9.0%       | 0.2% | 41.2% |       |       |
| Int                 | 10                          | 11                  | 9.0%       | 0.2% | 41.2% |       |       |
| Int                 | 11                          | 12                  | 8.3%       | 0.2% | 38.4% |       |       |
| Int                 | 14                          | 12                  | 0.0%       | 0%   | 26.5% |       |       |
| Int                 | 25                          | 11                  | 9.0%       | 0.2% | 41.2% |       |       |
| <i>Enterococcus</i> | Kanamycin                   | Min                 | 1          | 12   | 33.3% | 9.9%  | 65.1% |

|                     |                          |                     |            |     |       |       |       |       |       |
|---------------------|--------------------------|---------------------|------------|-----|-------|-------|-------|-------|-------|
| <i>Enterococcus</i> | Kanamycin<br>(continued) | Min                 | 6          | 10  | 0.0%  | 0%    | 30.8% |       |       |
|                     |                          | Min                 | 7          | 12  | 8.3%  | 0.2%  | 38.4% |       |       |
|                     |                          | Min                 | 8          | 7   | 0.0%  | 0%    | 41.0% |       |       |
|                     |                          | Min                 | 9          | 12  | 0.0%  | 0%    | 26.5% |       |       |
|                     |                          | Min                 | 10         | 12  | 8.3%  | 0.2%  | 38.4% |       |       |
|                     |                          | Min                 | 11         | 11  | 0.0%  | 0%    | 28.5% |       |       |
|                     |                          | Min                 | 14         | 12  | 8.3%  | 0.2%  | 38.4% |       |       |
|                     |                          | Min                 | 25         | 12  | 8.3%  | 0.2%  | 38.4% |       |       |
|                     |                          | Mod                 | 1          | 12  | 41.6% | 15.1% | 72.3% |       |       |
|                     |                          | Mod                 | 6          | 12  | 16.6% | 2.0%  | 48.4% |       |       |
|                     |                          | Mod                 | 7          | 10  | 0.0%  | 0%    | 30.8% |       |       |
|                     |                          | Mod                 | 8          | 8   | 12.5% | 0.3%  | 52.6% |       |       |
|                     |                          | Mod                 | 9          | 10  | 20.0% | 2.5%  | 55.6% |       |       |
|                     |                          | Mod                 | 10         | 9   | 11.1% | 0.2%  | 48.2% |       |       |
|                     |                          | Mod                 | 11         | 10  | 50.0% | 18.7% | 81.2% |       |       |
|                     |                          | Mod                 | 14         | 9   | 0.0%  | 0%    | 33.6% |       |       |
|                     |                          | Mod                 | 25         | 11  | 0.0%  | 0%    | 28.5% |       |       |
|                     |                          | Int                 | 1          | 12  | 16.6% | 2.0%  | 48.4% |       |       |
|                     |                          | Int                 | 6          | 11  | 9.0%  | 0.2%  | 41.2% |       |       |
|                     |                          | Int                 | 7          | 9   | 0.0%  | 0%    | 33.6% |       |       |
|                     |                          | Int                 | 8          | 12  | 8.3%  | 0.2%  | 38.4% |       |       |
|                     |                          | Int                 | 9          | 11  | 9.0%  | 0.2%  | 41.2% |       |       |
|                     |                          | Int                 | 10         | 11  | 9.0%  | 0.2%  | 41.2% |       |       |
|                     |                          | Int                 | 11         | 12  | 8.3%  | 0.2%  | 38.4% |       |       |
|                     |                          | Int                 | 14         | 12  | 16.6% | 2.0%  | 48.4% |       |       |
|                     |                          | Int                 | 25         | 11  | 27.2% | 6.0%  | 60.9% |       |       |
|                     |                          | <i>Enterococcus</i> | Lincomycin | Min | 1     | 12    | 100%  | 73.5% | 100%  |
|                     |                          |                     |            | Min | 6     | 10    | 100%  | 69.1% | 100%  |
|                     |                          |                     |            | Min | 7     | 12    | 91.6% | 61.5% | 99.7% |
|                     |                          |                     |            | Min | 8     | 7     | 85.7% | 42.1% | 99.6% |
| Min                 | 9                        |                     |            | 12  | 91.6% | 61.5% | 99.7% |       |       |
| Min                 | 10                       |                     |            | 12  | 100%  | 73.5% | 100%  |       |       |
| Min                 | 11                       |                     |            | 11  | 90.9% | 58.7% | 99.7% |       |       |
| Min                 | 14                       |                     |            | 12  | 100%  | 73.5% | 100%  |       |       |
| Min                 | 25                       |                     |            | 12  | 100%  | 73.5% | 100%  |       |       |
| Mod                 | 1                        |                     |            | 12  | 100%  | 73.5% | 100%  |       |       |
| Mod                 | 6                        |                     |            | 12  | 75.0% | 42.8% | 94.5% |       |       |
| Mod                 | 7                        |                     |            | 10  | 80.0% | 44.3% | 97.4% |       |       |
| Mod                 | 8                        |                     |            | 8   | 100%  | 63.0% | 100%  |       |       |
| Mod                 | 9                        |                     |            | 10  | 100%  | 69.1% | 100%  |       |       |
| Mod                 | 10                       |                     |            | 9   | 100%  | 66.3% | 100%  |       |       |
| Mod                 | 11                       |                     |            | 10  | 100%  | 69.1% | 100%  |       |       |
| Mod                 | 14                       |                     |            | 9   | 100%  | 66.3% | 100%  |       |       |
| Mod                 | 25                       |                     |            | 11  | 90.9% | 58.7% | 99.7% |       |       |
| Int                 | 1                        |                     |            | 12  | 100%  | 73.5% | 100%  |       |       |
| Int                 | 6                        |                     |            | 11  | 90.9% | 58.7% | 99.7% |       |       |
| Int                 | 7                        |                     |            | 9   | 88.8% | 51.7% | 99.7% |       |       |

|                     |                           |     |    |    |       |       |       |
|---------------------|---------------------------|-----|----|----|-------|-------|-------|
| <i>Enterococcus</i> | Lincomycin<br>(continued) | Int | 8  | 12 | 91.6% | 61.5% | 99.7% |
|                     |                           | Int | 9  | 11 | 100%  | 71.5% | 100%  |
|                     |                           | Int | 10 | 11 | 100%  | 71.5% | 100%  |
|                     |                           | Int | 11 | 12 | 100%  | 73.5% | 100%  |
|                     |                           | Int | 14 | 12 | 83.3% | 51.5% | 97.9% |
|                     |                           | Int | 25 | 11 | 90.9% | 58.7% | 99.7% |
| <i>Enterococcus</i> | Linezolid                 | Min | 1  | 12 | 0%    | 0%    | 26.5% |
|                     |                           | Min | 6  | 10 | 0%    | 0%    | 30.8% |
|                     |                           | Min | 7  | 12 | 0%    | 0%    | 26.5% |
|                     |                           | Min | 8  | 7  | 0%    | 0%    | 41.0% |
|                     |                           | Min | 9  | 12 | 0%    | 0%    | 26.5% |
|                     |                           | Min | 10 | 12 | 0%    | 0%    | 26.5% |
|                     |                           | Min | 11 | 11 | 0%    | 0%    | 28.5% |
|                     |                           | Min | 14 | 12 | 0%    | 0%    | 26.5% |
|                     |                           | Min | 25 | 12 | 0%    | 0%    | 26.5% |
|                     |                           | Mod | 1  | 12 | 0%    | 0%    | 26.5% |
|                     |                           | Mod | 6  | 12 | 0%    | 0%    | 26.5% |
|                     |                           | Mod | 7  | 10 | 0%    | 0%    | 30.8% |
|                     |                           | Mod | 8  | 8  | 0%    | 0%    | 36.9% |
|                     |                           | Mod | 9  | 10 | 0%    | 0%    | 30.8% |
|                     |                           | Mod | 10 | 9  | 0%    | 0%    | 33.6% |
|                     |                           | Mod | 11 | 10 | 0%    | 0%    | 30.8% |
|                     |                           | Mod | 14 | 9  | 0%    | 0%    | 33.6% |
|                     |                           | Mod | 25 | 11 | 0%    | 0%    | 28.5% |
|                     |                           | Int | 1  | 12 | 0%    | 0%    | 26.5% |
|                     |                           | Int | 6  | 11 | 0%    | 0%    | 28.5% |
|                     |                           | Int | 7  | 9  | 0%    | 0%    | 33.6% |
|                     |                           | Int | 8  | 12 | 0%    | 0%    | 26.5% |
|                     |                           | Int | 9  | 11 | 0%    | 0%    | 28.5% |
|                     |                           | Int | 10 | 11 | 0%    | 0%    | 28.5% |
|                     |                           | Int | 11 | 12 | 0%    | 0%    | 26.5% |
| Int                 | 14                        | 12  | 0% | 0% | 26.5% |       |       |
| Int                 | 25                        | 11  | 0% | 0% | 28.5% |       |       |
| <i>Enterococcus</i> | Nitrofurantoin            | Min | 1  | 12 | 0%    | 0%    | 26.5% |
|                     |                           | Min | 6  | 10 | 10.0% | 0.2%  | 44.5% |
|                     |                           | Min | 7  | 12 | 0%    | 0%    | 26.5% |
|                     |                           | Min | 8  | 7  | 0%    | 0%    | 41.0% |
|                     |                           | Min | 9  | 12 | 0%    | 0%    | 26.5% |
|                     |                           | Min | 10 | 12 | 0%    | 0%    | 26.5% |
|                     |                           | Min | 11 | 11 | 0%    | 0%    | 28.5% |
|                     |                           | Min | 14 | 12 | 16.6% | 2.0%  | 48.4% |
|                     |                           | Min | 25 | 12 | 8.3%  | 0.2%  | 38.4% |
|                     |                           | Mod | 1  | 12 | 16.6% | 2.0%  | 48.4% |
|                     |                           | Mod | 6  | 12 | 0%    | 0%    | 26.5% |
|                     |                           | Mod | 7  | 10 | 20.0% | 2.5%  | 55.6% |
|                     |                           | Mod | 8  | 8  | 0%    | 0%    | 36.9% |
|                     |                           | Mod | 9  | 10 | 20.0% | 2.5%  | 55.6% |



|                     |                               |                     |            |      |       |       |       |
|---------------------|-------------------------------|---------------------|------------|------|-------|-------|-------|
| <i>Enterococcus</i> | Nitrofurantoin<br>(continued) | Mod                 | 10         | 9    | 11.1% | 0.2%  | 48.2% |
|                     |                               | Mod                 | 11         | 10   | 10.0% | 0.2%  | 44.5% |
|                     |                               | Mod                 | 14         | 9    | 11.1% | 0.2%  | 48.2% |
|                     |                               | Mod                 | 25         | 11   | 18.1% | 2.2%  | 51.7% |
|                     |                               | Int                 | 1          | 12   | 0%    | 0%    | 26.5% |
|                     |                               | Int                 | 6          | 11   | 0%    | 0%    | 28.5% |
|                     |                               | Int                 | 7          | 9    | 0%    | 0%    | 33.6% |
|                     |                               | Int                 | 8          | 12   | 0%    | 0%    | 26.5% |
|                     |                               | Int                 | 9          | 11   | 0%    | 0%    | 28.5% |
|                     |                               | Int                 | 10         | 11   | 0%    | 0%    | 28.5% |
|                     |                               | Int                 | 11         | 12   | 0%    | 0%    | 26.5% |
|                     |                               | Int                 | 14         | 12   | 8.3%  | 0.2%  | 38.4% |
|                     |                               | Int                 | 25         | 11   | 27.2% | 6.0%  | 60.9% |
|                     |                               | <i>Enterococcus</i> | Penicillin | Min  | 1     | 12    | 0%    |
| Min                 | 6                             |                     |            | 10   | 0%    | 0%    | 30.8% |
| Min                 | 7                             |                     |            | 12   | 0%    | 0%    | 26.5% |
| Min                 | 8                             |                     |            | 7    | 0%    | 0%    | 41.0% |
| Min                 | 9                             |                     |            | 12   | 8.3%  | 0.2%  | 38.4% |
| Min                 | 10                            |                     |            | 12   | 0%    | 0%    | 26.5% |
| Min                 | 11                            |                     |            | 11   | 0%    | 0%    | 28.5% |
| Min                 | 14                            |                     |            | 12   | 0%    | 0%    | 26.5% |
| Min                 | 25                            |                     |            | 12   | 0%    | 0%    | 26.5% |
| Mod                 | 1                             |                     |            | 12   | 8.3%  | 0.2%  | 38.4% |
| Mod                 | 6                             |                     |            | 12   | 0%    | 0%    | 26.5% |
| Mod                 | 7                             |                     |            | 10   | 0%    | 0%    | 30.8% |
| Mod                 | 8                             |                     |            | 8    | 0%    | 0%    | 36.9% |
| Mod                 | 9                             |                     |            | 10   | 0%    | 0%    | 30.8% |
| Mod                 | 10                            |                     |            | 9    | 0%    | 0%    | 33.6% |
| Mod                 | 11                            |                     |            | 10   | 0%    | 0%    | 30.8% |
| Mod                 | 14                            |                     |            | 9    | 0%    | 0%    | 33.6% |
| Mod                 | 25                            |                     |            | 11   | 0%    | 0%    | 28.5% |
| Int                 | 1                             |                     |            | 12   | 8.3%  | 0.2%  | 38.4% |
| Int                 | 6                             |                     |            | 11   | 0%    | 0%    | 28.5% |
| Int                 | 7                             |                     |            | 9    | 0%    | 0%    | 33.6% |
| Int                 | 8                             |                     |            | 12   | 0%    | 0%    | 26.5% |
| Int                 | 9                             |                     |            | 11   | 0%    | 0%    | 28.5% |
| Int                 | 10                            |                     |            | 11   | 9.0%  | 0.2%  | 41.2% |
| Int                 | 11                            |                     |            | 12   | 0%    | 0%    | 26.5% |
| Int                 | 14                            | 12                  | 8.3%       | 0.2% | 38.4% |       |       |
| Int                 | 25                            | 11                  | 18.1%      | 2.2% | 51.7% |       |       |
| <i>Enterococcus</i> | Quin / Dalf                   | Min                 | 1          | 12   | 91.6% | 61.5% | 99.7% |
|                     |                               | Min                 | 6          | 10   | 40.0% | 12.1% | 73.7% |
|                     |                               | Min                 | 7          | 12   | 16.6% | 2.0%  | 48.4% |
|                     |                               | Min                 | 8          | 7    | 0%    | 0%    | 41.0% |
|                     |                               | Min                 | 9          | 12   | 50.0% | 21.0% | 78.9% |
|                     |                               | Min                 | 10         | 12   | 66.6% | 34.8% | 90.0% |
|                     |                               | Min                 | 11         | 11   | 63.6% | 30.7% | 89.0% |

|                     |                            |                     |              |      |       |       |       |
|---------------------|----------------------------|---------------------|--------------|------|-------|-------|-------|
| <i>Enterococcus</i> | Quin / Dalf<br>(continued) | Min                 | 14           | 12   | 83.3% | 51.5% | 97.9% |
|                     |                            | Min                 | 25           | 12   | 58.3% | 27.6% | 84.8% |
|                     |                            | Mod                 | 1            | 12   | 75.0% | 42.8% | 94.5% |
|                     |                            | Mod                 | 6            | 12   | 16.6% | 2.0%  | 48.4% |
|                     |                            | Mod                 | 7            | 10   | 20.0% | 2.5%  | 55.6% |
|                     |                            | Mod                 | 8            | 8    | 37.5% | 8.5%  | 75.5% |
|                     |                            | Mod                 | 9            | 10   | 50.0% | 18.7% | 81.2% |
|                     |                            | Mod                 | 10           | 9    | 33.3% | 7.4%  | 70.0% |
|                     |                            | Mod                 | 11           | 10   | 80.0% | 44.3% | 97.4% |
|                     |                            | Mod                 | 14           | 9    | 77.7% | 39.9% | 97.1% |
|                     |                            | Mod                 | 25           | 11   | 63.6% | 30.7% | 89.0% |
|                     |                            | Int                 | 1            | 12   | 66.6% | 34.8% | 90.0% |
|                     |                            | Int                 | 6            | 11   | 45.4% | 16.7% | 76.6% |
|                     |                            | Int                 | 7            | 9    | 44.4% | 13.7% | 78.8% |
|                     |                            | Int                 | 8            | 12   | 58.3% | 27.6% | 84.8% |
|                     |                            | Int                 | 9            | 11   | 72.7% | 39.0% | 93.9% |
|                     |                            | Int                 | 10           | 11   | 36.3% | 10.9% | 69.2% |
|                     |                            | Int                 | 11           | 12   | 41.6% | 15.1% | 72.3% |
|                     |                            | Int                 | 14           | 12   | 41.6% | 15.1% | 72.3% |
|                     |                            | Int                 | 25           | 11   | 45.4% | 16.7% | 76.6% |
|                     |                            | <i>Enterococcus</i> | Streptomycin | Min  | 1     | 12    | 33.3% |
| Min                 | 6                          |                     |              | 10   | 0%    | 0%    | 30.8% |
| Min                 | 7                          |                     |              | 12   | 8.3%  | 0.2%  | 38.4% |
| Min                 | 8                          |                     |              | 7    | 0%    | 0%    | 41.0% |
| Min                 | 9                          |                     |              | 12   | 0%    | 0%    | 26.5% |
| Min                 | 10                         |                     |              | 12   | 8.3%  | 0.2%  | 38.4% |
| Min                 | 11                         |                     |              | 11   | 9.0%  | 0.2%  | 41.2% |
| Min                 | 14                         |                     |              | 12   | 8.3%  | 0.2%  | 38.4% |
| Min                 | 25                         |                     |              | 12   | 8.3%  | 0.2%  | 38.4% |
| Mod                 | 1                          |                     |              | 12   | 41.6% | 15.1% | 72.3% |
| Mod                 | 6                          |                     |              | 12   | 16.6% | 2.0%  | 48.4% |
| Mod                 | 7                          |                     |              | 10   | 0%    | 0%    | 30.8% |
| Mod                 | 8                          |                     |              | 8    | 12.5% | 0.3%  | 52.6% |
| Mod                 | 9                          |                     |              | 10   | 20.0% | 2.5%  | 55.6% |
| Mod                 | 10                         |                     |              | 9    | 11.1% | 0.2%  | 48.2% |
| Mod                 | 11                         |                     |              | 10   | 50.0% | 18.7% | 81.2% |
| Mod                 | 14                         |                     |              | 9    | 0%    | 0%    | 33.6% |
| Mod                 | 25                         |                     |              | 11   | 0%    | 0%    | 28.5% |
| Int                 | 1                          |                     |              | 12   | 16.6% | 2.0%  | 48.4% |
| Int                 | 6                          |                     |              | 11   | 18.1% | 2.2%  | 51.7% |
| Int                 | 7                          |                     |              | 9    | 0%    | 0%    | 33.6% |
| Int                 | 8                          | 12                  | 8.3%         | 0.2% | 38.4% |       |       |
| Int                 | 9                          | 11                  | 9.0%         | 0.2% | 41.2% |       |       |
| Int                 | 10                         | 11                  | 9.0%         | 0.2% | 41.2% |       |       |
| Int                 | 11                         | 12                  | 8.3%         | 0.2% | 38.4% |       |       |
| Int                 | 14                         | 12                  | 25.0%        | 5.4% | 57.1% |       |       |
| Int                 | 25                         | 11                  | 27.2%        | 6.0% | 60.9% |       |       |

|                     |              |     |       |       |        |       |        |
|---------------------|--------------|-----|-------|-------|--------|-------|--------|
| <i>Enterococcus</i> | Tetracycline | Min | 1     | 12    | 100.0% | 73.5% | 100.0% |
|                     |              | Min | 6     | 10    | 90.0%  | 55.5% | 99.7%  |
|                     |              | Min | 7     | 12    | 66.6%  | 34.8% | 90.0%  |
|                     |              | Min | 8     | 7     | 28.5%  | 3.6%  | 70.9%  |
|                     |              | Min | 9     | 12    | 66.6%  | 34.8% | 90.0%  |
|                     |              | Min | 10    | 12    | 66.6%  | 34.8% | 90.0%  |
|                     |              | Min | 11    | 11    | 63.6%  | 30.7% | 89.0%  |
|                     |              | Min | 14    | 12    | 58.3%  | 27.6% | 84.8%  |
|                     |              | Min | 25    | 12    | 91.6%  | 61.5% | 99.7%  |
|                     |              | Mod | 1     | 12    | 100.0% | 73.5% | 100.0% |
|                     |              | Mod | 6     | 12    | 41.6%  | 15.1% | 72.3%  |
|                     |              | Mod | 7     | 10    | 50.0%  | 18.7% | 81.2%  |
|                     |              | Mod | 8     | 8     | 87.5%  | 47.3% | 99.6%  |
|                     |              | Mod | 9     | 10    | 80.0%  | 44.3% | 97.4%  |
|                     |              | Mod | 10    | 9     | 55.5%  | 21.2% | 86.3%  |
|                     |              | Mod | 11    | 10    | 100.0% | 69.1% | 100.0% |
|                     |              | Mod | 14    | 9     | 66.6%  | 29.9% | 92.5%  |
|                     |              | Mod | 25    | 11    | 72.7%  | 39.0% | 93.9%  |
|                     |              | Int | 1     | 12    | 100.0% | 73.5% | 100.0% |
|                     |              | Int | 6     | 11    | 63.6%  | 30.7% | 89.0%  |
|                     |              | Int | 7     | 9     | 77.7%  | 39.9% | 97.1%  |
|                     |              | Int | 8     | 12    | 91.6%  | 61.5% | 99.7%  |
|                     |              | Int | 9     | 11    | 100.0% | 71.5% | 100.0% |
|                     |              | Int | 10    | 11    | 100.0% | 71.5% | 100.0% |
|                     |              | Int | 11    | 12    | 91.6%  | 61.5% | 99.7%  |
| Int                 | 14           | 12  | 58.3% | 27.6% | 84.8%  |       |        |
| Int                 | 25           | 11  | 81.8% | 48.2% | 97.7%  |       |        |
| <i>Enterococcus</i> | Tigecycline  | Min | 1     | 12    | 0.0%   | 0%    | 26.5%  |
|                     |              | Min | 6     | 10    | 0.0%   | 0%    | 30.8%  |
|                     |              | Min | 7     | 12    | 0.0%   | 0%    | 26.5%  |
|                     |              | Min | 8     | 7     | 0.0%   | 0%    | 41.0%  |
|                     |              | Min | 9     | 12    | 0.0%   | 0%    | 26.5%  |
|                     |              | Min | 10    | 12    | 0.0%   | 0%    | 26.5%  |
|                     |              | Min | 11    | 11    | 9.0%   | 0.2%  | 41.2%  |
|                     |              | Min | 14    | 12    | 0.0%   | 0%    | 26.5%  |
|                     |              | Min | 25    | 12    | 0.0%   | 0%    | 26.5%  |
|                     |              | Mod | 1     | 12    | 0.0%   | 0%    | 26.5%  |
|                     |              | Mod | 6     | 12    | 0.0%   | 0%    | 26.5%  |
|                     |              | Mod | 7     | 10    | 0.0%   | 0%    | 30.8%  |
|                     |              | Mod | 8     | 8     | 0.0%   | 0%    | 36.9%  |
|                     |              | Mod | 9     | 10    | 0.0%   | 0%    | 30.8%  |
|                     |              | Mod | 10    | 9     | 0.0%   | 0%    | 33.6%  |
|                     |              | Mod | 11    | 10    | 0.0%   | 0%    | 30.8%  |
|                     |              | Mod | 14    | 9     | 0.0%   | 0%    | 33.6%  |
|                     |              | Mod | 25    | 11    | 0.0%   | 0%    | 28.5%  |
|                     |              | Int | 1     | 12    | 0.0%   | 0%    | 26.5%  |
|                     |              | Int | 6     | 11    | 0.0%   | 0%    | 28.5%  |

|                     |                            |     |       |       |       |       |       |
|---------------------|----------------------------|-----|-------|-------|-------|-------|-------|
| <i>Enterococcus</i> | Tigecycline<br>(continued) | Int | 7     | 9     | 0.0%  | 0%    | 33.6% |
|                     |                            | Int | 8     | 12    | 0.0%  | 0%    | 26.5% |
|                     |                            | Int | 9     | 11    | 0.0%  | 0%    | 28.5% |
|                     |                            | Int | 10    | 11    | 0.0%  | 0%    | 28.5% |
|                     |                            | Int | 11    | 12    | 0.0%  | 0%    | 26.5% |
|                     |                            | Int | 14    | 12    | 0.0%  | 0%    | 26.5% |
|                     |                            | Int | 25    | 11    | 0.0%  | 0%    | 28.5% |
| <i>Enterococcus</i> | Tylosin                    | Min | 1     | 12    | 91.6% | 61.5% | 99.7% |
|                     |                            | Min | 6     | 10    | 30.0% | 6.6%  | 65.2% |
|                     |                            | Min | 7     | 12    | 16.6% | 2.0%  | 48.4% |
|                     |                            | Min | 8     | 7     | 0.0%  | 0%    | 41.0% |
|                     |                            | Min | 9     | 12    | 25.0% | 5.4%  | 57.1% |
|                     |                            | Min | 10    | 12    | 41.6% | 15.1% | 72.3% |
|                     |                            | Min | 11    | 11    | 45.4% | 16.7% | 76.6% |
|                     |                            | Min | 14    | 12    | 50.0% | 21.0% | 78.9% |
|                     |                            | Min | 25    | 12    | 50.0% | 21.0% | 78.9% |
|                     |                            | Mod | 1     | 12    | 66.6% | 34.8% | 90.0% |
|                     |                            | Mod | 6     | 12    | 25.0% | 5.4%  | 57.1% |
|                     |                            | Mod | 7     | 10    | 10.0% | 0.2%  | 44.5% |
|                     |                            | Mod | 8     | 8     | 50.0% | 15.7% | 84.3% |
|                     |                            | Mod | 9     | 10    | 50.0% | 18.7% | 81.2% |
|                     |                            | Mod | 10    | 9     | 33.3% | 7.4%  | 70.0% |
|                     |                            | Mod | 11    | 10    | 70.0% | 34.7% | 93.3% |
|                     |                            | Mod | 14    | 9     | 66.6% | 29.9% | 92.5% |
|                     |                            | Mod | 25    | 11    | 36.3% | 10.9% | 69.2% |
|                     |                            | Int | 1     | 12    | 66.6% | 34.8% | 90.0% |
|                     |                            | Int | 6     | 11    | 27.2% | 6.0%  | 60.9% |
|                     |                            | Int | 7     | 9     | 44.4% | 13.7% | 78.8% |
|                     |                            | Int | 8     | 12    | 58.3% | 27.6% | 84.8% |
|                     |                            | Int | 9     | 11    | 72.7% | 39.0% | 93.9% |
|                     |                            | Int | 10    | 11    | 36.3% | 10.9% | 69.2% |
|                     |                            | Int | 11    | 12    | 50.0% | 21.0% | 78.9% |
| Int                 | 14                         | 12  | 33.3% | 9.9%  | 65.1% |       |       |
| Int                 | 25                         | 11  | 45.4% | 16.7% | 76.6% |       |       |
| <i>Enterococcus</i> | Vancomycin                 | Min | 1     | 12    | 0%    | 0%    | 26.5% |
|                     |                            | Min | 6     | 10    | 0%    | 0%    | 30.8% |
|                     |                            | Min | 7     | 12    | 0%    | 0%    | 26.5% |
|                     |                            | Min | 8     | 7     | 0%    | 0%    | 41.0% |
|                     |                            | Min | 9     | 12    | 0%    | 0%    | 26.5% |
|                     |                            | Min | 10    | 12    | 0%    | 0%    | 26.5% |
|                     |                            | Min | 11    | 11    | 0%    | 0%    | 28.5% |
|                     |                            | Min | 14    | 12    | 0%    | 0%    | 26.5% |
|                     |                            | Min | 25    | 12    | 0%    | 0%    | 26.5% |
|                     |                            | Mod | 1     | 12    | 0%    | 0%    | 26.5% |
|                     |                            | Mod | 6     | 12    | 0%    | 0%    | 26.5% |
|                     |                            | Mod | 7     | 10    | 0%    | 0%    | 30.8% |
|                     |                            | Mod | 8     | 8     | 0%    | 0%    | 36.9% |

|                     |                           |     |    |    |    |    |       |
|---------------------|---------------------------|-----|----|----|----|----|-------|
| <i>Enterococcus</i> | Vancomycin<br>(continued) | Mod | 9  | 10 | 0% | 0% | 30.8% |
|                     |                           | Mod | 10 | 9  | 0% | 0% | 33.6% |
|                     |                           | Mod | 11 | 10 | 0% | 0% | 30.8% |
|                     |                           | Mod | 14 | 9  | 0% | 0% | 33.6% |
|                     |                           | Mod | 25 | 11 | 0% | 0% | 28.5% |
|                     |                           | Int | 1  | 12 | 0% | 0% | 26.5% |
|                     |                           | Int | 6  | 11 | 0% | 0% | 28.5% |
|                     |                           | Int | 7  | 9  | 0% | 0% | 33.6% |
|                     |                           | Int | 8  | 12 | 0% | 0% | 26.5% |
|                     |                           | Int | 9  | 11 | 0% | 0% | 28.5% |
|                     |                           | Int | 10 | 11 | 0% | 0% | 28.5% |
|                     |                           | Int | 11 | 12 | 0% | 0% | 26.5% |
|                     |                           | Int | 14 | 12 | 0% | 0% | 26.5% |
|                     |                           | Int | 25 | 11 | 0% | 0% | 28.5% |

12

13 Table S3. Number and proportion (95% confidence intervals) of resistant isolates for each *E. coli*-  
 14 antimicrobial and *Enterococcus sp.*-antimicrobial combination by treatment group and sample week. N =  
 15 number of pens per treatment group where respective organism was isolated.

16

17

18

|                              | Chlor   |       | Cipro   | Cipro   | Cipro   |         |       | Eryth | Eryth   | Erythro |         |         |       |
|------------------------------|---------|-------|---------|---------|---------|---------|-------|-------|---------|---------|---------|---------|-------|
|                              | Cipro   |       | Cipro   | Eryth   | Cipro   |         |       | Eryth | Eryth   |         |         |         |       |
|                              | Eryth   |       | Eryth   | Kanam   | Eryth   | Cipro   |       | Eryth | Eryth   |         |         |         |       |
|                              | Kanam   |       | Genta   | Linco   | Kanam   | Eryth   |       | Genta | Kanam   | Erythro |         |         |       |
|                              | Linco   |       | Kanam   | Nitro   | Linco   | Kanam   |       | Kanam | Linco   | Kanam   | Eryth   |         |       |
|                              | Nitro   |       | Linco   | Pen     | Nitro   | Linco   |       | Linco | Pen     | Linco   | Kanam   |         |       |
|                              | Quin    |       | Quin    | Quin    | Quin    | Quin    | Cipro | Quin  | Quin    | Quin    | Linco   |         |       |
|                              | Strep   |       | Strep   | Strep   | Strep   | Strep   | Linco | Strep | Strep   | Strep   | Strep   |         |       |
|                              | Tetra   |       | Tetra   | Tetra   | Tetra   | Tetra   | Strep | Tetra | Tetra   | Tetra   | Tetra   | Eryth   |       |
|                              | Tylosin | Cipro | Tylosin | Tylosin | Tylosin | Tylosin | Tetra | Tetra | Tylosin | Tylosin | Tylosin | Tylosin | Linco |
| <b>Minimal Group</b>         |         |       |         |         |         |         |       |       |         |         |         |         |       |
| <i>Enterococcus durans</i>   |         |       |         |         |         |         |       |       |         |         |         |         |       |
| <i>Enterococcus faecalis</i> |         |       |         |         |         |         |       |       |         |         |         |         |       |
| <i>Enterococcus faecium</i>  |         |       |         |         |         |         |       |       |         |         |         |         |       |
| <i>Enterococcus hirae</i>    |         |       |         |         |         |         |       |       |         |         |         |         |       |
| <b>Moderate Group</b>        |         |       |         |         |         |         |       |       |         |         |         |         |       |
| <i>Enterococcus faecalis</i> |         |       |         |         |         |         |       |       |         |         |         |         |       |
| <i>Enterococcus faecium</i>  |         |       |         |         |         |         |       |       |         |         |         |         |       |
| <i>Enterococcus hirae</i>    |         |       |         |         |         |         |       |       |         |         |         |         |       |
| <b>Intensive Group</b>       |         |       |         |         |         |         |       |       |         |         |         |         |       |
| <i>Enterococcus durans</i>   |         |       |         |         |         |         |       |       |         |         |         |         |       |
| <i>Enterococcus faecalis</i> |         |       |         |         |         |         |       |       |         |         |         |         |       |
| <i>Enterococcus faecium</i>  |         |       |         |         |         |         |       |       |         |         |         |         |       |
| <i>Enterococcus hirae</i>    |         |       |         |         |         |         |       |       |         |         |         |         |       |
| <i>Enterococcus villorum</i> |         |       |         |         |         |         |       |       |         |         |         |         |       |

19

20

21

| (Continued)                  | Eryth<br>Linco<br>Nitro<br>Quin<br>Tetra<br>Tylosin | Eryth<br>Linco<br>Pen<br>Quin<br>Tetra<br>Tylosin | Eryth<br>Linco<br>Quin<br>Tetra<br>Tylosin | Eryth<br>Linco<br>Quin<br>Tetra<br>Tylosin | Eryth<br>Linco<br>Quin<br>Tetra<br>Tylosin | Linco | Linco<br>Nitro | Linco<br>Nitro<br>Quin | Linco<br>Quin | Linco<br>Quin<br>Tetra | Linco<br>Strep<br>Tetra | Linco<br>Tetra | Linco<br>Tylosin | Nitro | Pan-<br>susceptible |
|------------------------------|-----------------------------------------------------|---------------------------------------------------|--------------------------------------------|--------------------------------------------|--------------------------------------------|-------|----------------|------------------------|---------------|------------------------|-------------------------|----------------|------------------|-------|---------------------|
| <b>Minimal Group</b>         |                                                     |                                                   |                                            |                                            |                                            |       |                |                        |               |                        |                         |                |                  |       |                     |
| <i>Enterococcus durans</i>   |                                                     | 1                                                 |                                            |                                            | 2                                          |       |                |                        |               |                        |                         |                |                  |       |                     |
| <i>Enterococcus faecalis</i> |                                                     |                                                   |                                            | 1                                          | 18                                         |       |                |                        |               |                        |                         |                |                  |       |                     |
| <i>Enterococcus faecium</i>  |                                                     |                                                   | 2                                          |                                            | 1                                          | 11    | 1              | 3                      | 5             | 4                      |                         | 4              |                  |       |                     |
| <i>Enterococcus hirae</i>    |                                                     |                                                   |                                            |                                            | 8                                          | 1     |                |                        |               |                        |                         | 12             |                  |       |                     |
| <b>Moderate Group</b>        |                                                     |                                                   |                                            |                                            |                                            |       |                |                        |               |                        |                         |                |                  |       |                     |
| <i>Enterococcus faecalis</i> |                                                     |                                                   |                                            |                                            | 16                                         |       |                |                        |               |                        |                         | 1              |                  |       |                     |
| <i>Enterococcus faecium</i>  | 2                                                   |                                                   |                                            |                                            |                                            | 9     | 4              | 2                      | 1             |                        |                         | 1              |                  | 1     | 3                   |
| <i>Enterococcus hirae</i>    |                                                     |                                                   |                                            |                                            | 11                                         |       |                |                        |               | 3                      |                         | 20             |                  |       |                     |
| <b>Intensive Group</b>       |                                                     |                                                   |                                            |                                            |                                            |       |                |                        |               |                        |                         |                |                  |       |                     |
| <i>Enterococcus durans</i>   |                                                     |                                                   |                                            |                                            | 2                                          |       |                |                        |               |                        |                         | 1              |                  |       |                     |
| <i>Enterococcus faecalis</i> |                                                     |                                                   |                                            |                                            | 11                                         |       |                |                        |               |                        |                         | 2              |                  |       |                     |
| <i>Enterococcus faecium</i>  |                                                     |                                                   |                                            |                                            |                                            | 4     | 1              |                        | 3             |                        | 1                       | 2              |                  |       | 5                   |
| <i>Enterococcus hirae</i>    |                                                     | 1                                                 |                                            |                                            | 19                                         |       |                |                        |               | 1                      | 1                       | 27             | 1                |       |                     |
| <i>Enterococcus villorum</i> |                                                     |                                                   |                                            |                                            | 1                                          |       |                |                        |               |                        |                         |                |                  |       |                     |

23 Table S4. Distribution of antimicrobial resistance patterns (number of isolates) by *Enterococcus* species and treatment group. *Antimicrobial*  
24 *key:* Chlor = chloramphenicol, Cipro = ciprofloxacin, Dapto = daptomycin, Eryth = erythromycin, Genta = gentamicin, Kanam = kanamycin,  
25 Linco = lincomycin, Linez = linezolid, Nitro = nitrofurantoin, Pen = penicillin, Quin = quinupristin-dalfopristin, Strep = streptomycin, Tetra =  
26 tetracycline, Tige = tigecycline, Tylosin = tylosin tartrate, Vanco = vancomycin

27



| <b>Bacterial Species</b> | <b>Antimicrobial</b>          | <b>GEE Group + Date + Group*Date + Rep Meas (QIC)</b> | <b>GEE Group + Date + Rep Meas (QIC)</b> | <b>GEE Group + Rep Meas (QIC)</b> | <b>GEE Date + Rep Meas (QIC)</b> |
|--------------------------|-------------------------------|-------------------------------------------------------|------------------------------------------|-----------------------------------|----------------------------------|
| <i>E.coli</i>            | Amoxicillin/Clavulanic Acid   |                                                       |                                          | 78.33                             |                                  |
| <i>E.coli</i>            | Ampicillin                    | 432.2                                                 | 414.37                                   | 405.8                             | 416.74                           |
| <i>E.coli</i>            | Azithromycin                  |                                                       |                                          |                                   |                                  |
| <i>E.coli</i>            | Cefoxitin                     |                                                       |                                          |                                   |                                  |
| <i>E.coli</i>            | Ceftiofur                     |                                                       |                                          |                                   |                                  |
| <i>E.coli</i>            | Ceftriaxone                   |                                                       |                                          |                                   |                                  |
| <i>E.coli</i>            | Chloramphenicol               |                                                       | 169.59                                   | 161.13                            | 166.67                           |
| <i>E.coli</i>            | Ciprofloxacin                 |                                                       |                                          |                                   |                                  |
| <i>E.coli</i>            | Gentamicin                    |                                                       |                                          | 47.61                             |                                  |
| <i>E.coli</i>            | Nalidixic Acid                |                                                       |                                          |                                   |                                  |
| <i>E.coli</i>            | Streptomycin                  |                                                       | 367.48                                   | 364.89                            | 404.07                           |
| <i>E.coli</i>            | Sulfisoxazole                 |                                                       | 260.84                                   | 251.83                            | 254.21                           |
| <i>E.coli</i>            | Tetracycline                  |                                                       | 224.39                                   | 211.64                            | 224.77                           |
| <i>E.coli</i>            | Trimethoprim/Sulfamethoxazole |                                                       |                                          |                                   |                                  |
| <i>Enterococcus</i>      | Chloramphenicol               |                                                       |                                          |                                   |                                  |
| <i>Enterococcus</i>      | Ciprofloxacin                 |                                                       |                                          | 190.66                            |                                  |
| <i>Enterococcus</i>      | Daptomycin                    |                                                       |                                          | 90.52                             |                                  |
| <i>Enterococcus</i>      | Erythromycin                  | 403.83                                                | 399.9                                    | 407.89                            | 396.95                           |
| <i>Enterococcus</i>      | Gentamycin                    |                                                       |                                          | 90.81                             |                                  |
| <i>Enterococcus</i>      | Kanamycin                     |                                                       | 223.27                                   | 223.38                            | 220.93                           |
| <i>Enterococcus</i>      | Lincomycin                    |                                                       |                                          | 135.27                            |                                  |
| <i>Enterococcus</i>      | Linezolid                     |                                                       |                                          |                                   |                                  |
| <i>Enterococcus</i>      | Nitrofurantoin                |                                                       |                                          | 139.66                            |                                  |
| <i>Enterococcus</i>      | Penicillin                    |                                                       |                                          | 67.85                             |                                  |
| <i>Enterococcus</i>      | Quinupristin/Dalfopristin     | 394.93                                                | 393.6                                    | 407.76                            | 391.29                           |
| <i>Enterococcus</i>      | Streptomycin                  |                                                       | 236.41                                   | 237.44                            | 232.19                           |
| <i>Enterococcus</i>      | Tetracycline                  |                                                       | 299.34                                   | 317.16                            |                                  |
| <i>Enterococcus</i>      | Tigecycline                   |                                                       |                                          |                                   |                                  |
| <i>Enterococcus</i>      | Tylosin                       |                                                       | 394.49                                   | 404.84                            | 392.76                           |
| <i>Enterococcus</i>      | Vancomycin                    |                                                       |                                          |                                   |                                  |

28

29 Table S5. Quasi Information Criterion (QIC) results for each bacteria-antimicrobial combinations of the four generalized estimating equation  
30 models generated.

31

32
